# Supplementary material
Source: PubMed Central journal article supplement (PMC3171746)
Supplement: NIHMS270424-supplement-Suppl_Data.pdf [file NIHMS270424-supplement-Suppl_Data.pdf]

pr-2010-008702.R1

## Identification of CaMKII Phosphorylation Sites in Connexin43 by High-Resolution Mass Spectrometry

Richard Y-C. Huang, James G. Laing, Evelyn M. Kanter, Viviana M. Berthoud, Mingwei Bao, Henry W. Rohrs, R. Reid Townsend, Kathryn A. Yamada

### Supporting Information

**Figure S1.** Number of casein phosphorylation sites identified after in vitro phosphorylation by CaMKII as a function of the amount of casein substrate used in the reaction. The higher the casein concentration, the more phosphorylated residues were identified.

**Figure S2.** MALDI spectra of autocalmitide. (A) Positive control shows the phosphorylated peptide (KKALHRQEpTVDAL) of  $m/z$  1588.6028. (B) Negative control shows the non-phosphorylated peptide (KKALHRQETVDAL) of  $m/z$  1508.7915. (C) In vitro phosphorylation of autocalmitide by CaMKII resulted in the phosphorylated peptide (KKALHRQEpTVDAL) of  $m/z$  1588.8795 (arrow).

**Figure S3.** CaMKII phosphorylation of Cx43-CT at S325 and S328. (A) Extracted chromatogram of  $m/z$  953.0603-953.0699. (B) MS spectrum of  $m/z$  659.0708 represents triply charged peptide MGQAGSTISNSHAQPFDPPDDNQNAK (one phosphorylation site). (C) CID MS2 spectrum indicates peptide phosphorylated on S325. (D) ETD MS2 spectrum indicates peptide phosphorylated on S325. (E) ETD MS2 spectrum indicates peptide phosphorylated on S328. See Supplemental Table S3 for complete list of theoretical (ProteinProspector) and observed fragment ions.

**Figure S4.** CK1 phosphorylation of Cx43-CT at S306. (A) Extracted chromatogram of  $m/z$  988.3947-988.4007. (B) MS spectrum of 988.3977 represents doubly charged peptide QASEQNWANYSAEQNR (one phosphorylation site). (C) CID MS2 spectrum indicates peptide phosphorylated on S306.

**Figure S5.** CaMKII phosphorylation of Cx43-CT at S255 and S257. (A) Extracted chromatogram of  $m/z$  617.6179-617.6203. (B) MS spectrum of  $m/z$  617.6193 represents triply charged peptide GRSDPYHATTGPLSPSK (one phosphorylation site). (C) CID MS2 spectrum indicates peptide phosphorylated on S255. (D) ETD MS2 spectrum indicates peptide phosphorylated on S255. (E) CID MS2 spectrum indicates peptide phosphorylated on S257. (F) ETD MS2 spectrum indicates peptide phosphorylated on S257. See Supplemental Table S4 for complete list of theoretical (ProteinProspector) and observed fragment ions.

**Figure S6.** CaMKII phosphorylation of Cx43-CT at S296 and S297. (A) Extracted chromatogram of  $m/z$  668.7571-668.7611. (B) MS spectrum of  $m/z$  668.7591 represents doubly charged peptide NNSSCRNYNK (one phosphorylation site, one carbamidomethylation site). (C) CID MS2 spectrum indicates peptide phosphorylated on S296. (D) Extracted chromatogram of  $m/z$  659.9552-659.9692. (E) MS spectrum of  $m/z$  659.9572 represents triply charged peptide LVTGDRNNSSCRNYNK (one phosphorylation site, one carbamidomethylation site). (F) CID MS2 spectrum indicates peptide phosphorylated on S297. (G) Extracted chromatogram of  $m/z$  487.2102-487.2132. (H) MS spectrum of  $m/z$  487.2094 represents triply charged peptide LVTGDRNNSSCR (one phosphorylation site, one carbamidomethylation site). (I) ETD MS2

spectrum indicates peptide phosphorylated on S296. (J) Extracted chromatogram of  $m/z$  730.8048-730.8092. (K) MS spectrum of  $m/z$  730.8062 represents doubly charged peptide LVTGDRNNSCR (one phosphorylation site, one deamidation site, one carbamidomethylation site). (L) ETD MS2 spectrum indicates peptide phosphorylated on S297. See Supplemental Table S6 for complete list of theoretical (ProteinProspector) and observed fragment ions.

**Figure S7.** CaMKII phosphorylation of Cx43-CT at S364 and S365. (A) Extracted chromatogram of  $m/z$  742.0376-742.0420. (B) MS spectrum of  $m/z$  742.0398 represents triply charged peptide VAAGHELQPLAIVDQRSSR (one phosphorylation site). (C) CID MS2 spectrum indicates peptide phosphorylated on S364. (D) CID MS2 spectrum indicates peptide phosphorylated on S365. (E) ETD MS2 spectrum indicates peptide phosphorylated on S364. See Supplemental Table S7 for complete list of theoretical (ProteinProspector) and observed fragment ions.

**Figure S8.** CaMKII phosphorylation of Cx43-CT at S369, S372 and S373. (A) Extracted chromatogram of  $m/z$  718.3220-718.3292. (B) MS spectrum of  $m/z$  718.3282 represents doubly charged peptide ASSRPRPDDLEI (one phosphorylation site). (C) CID MS2 spectrum indicates peptide phosphorylated on S372. (D) CID MS2 spectrum indicates peptide phosphorylated on S373. (E) Extracted chromatogram of  $m/z$  612.9569-612.9631. (F) MS spectrum of  $m/z$  612.9589 represents triply charged peptide ASSRASSRPRPDDLEI (one phosphorylation site). (G) ETD MS2 spectrum indicates peptide phosphorylated on S372. (H) Extracted chromatogram of  $m/z$  639.6068-639.6132. (I) MS spectrum of  $m/z$  639.6113 represents triply charged peptide ASSRASSRPRPDDLEI (two phosphorylation sites). (J) ETD MS2 spectrum indicates peptide

phosphorylated on S369 and S373. See Supplemental Table S8 for complete list of theoretical (ProteinProspector) and observed fragment ions.

**Figure S9.** Baseline phosphorylation of native ventricular Cx43 at S306. (A) Extracted chromatogram of  $m/z$  988.4000-988.4020. (B) MS spectrum of  $m/z$  988.4009 represents doubly charged peptide QASEQNWANYSAEQNR (one phosphorylation site). (C) CID MS2 spectrum indicates peptide phosphorylated on S306. See Supplemental Table S9 for complete list of theoretical (ProteinProspector) and observed fragment ions.

**Figure S10.** Baseline phosphorylation of native ventricular Cx43 at S372 and S373. (A) Extracted chromatogram of  $m/z$  639.6127-639.6153. (B) MS spectrum of  $m/z$  639.6140 represents triply charged peptide ASSRASSRPRPDDLEI (two phosphorylation sites). (C) ETD MS2 spectrum indicates peptide phosphorylated on S372 and S373. See Supplemental Table S10 for complete list of theoretical (ProteinProspector) and observed fragment ions.

Figure S1

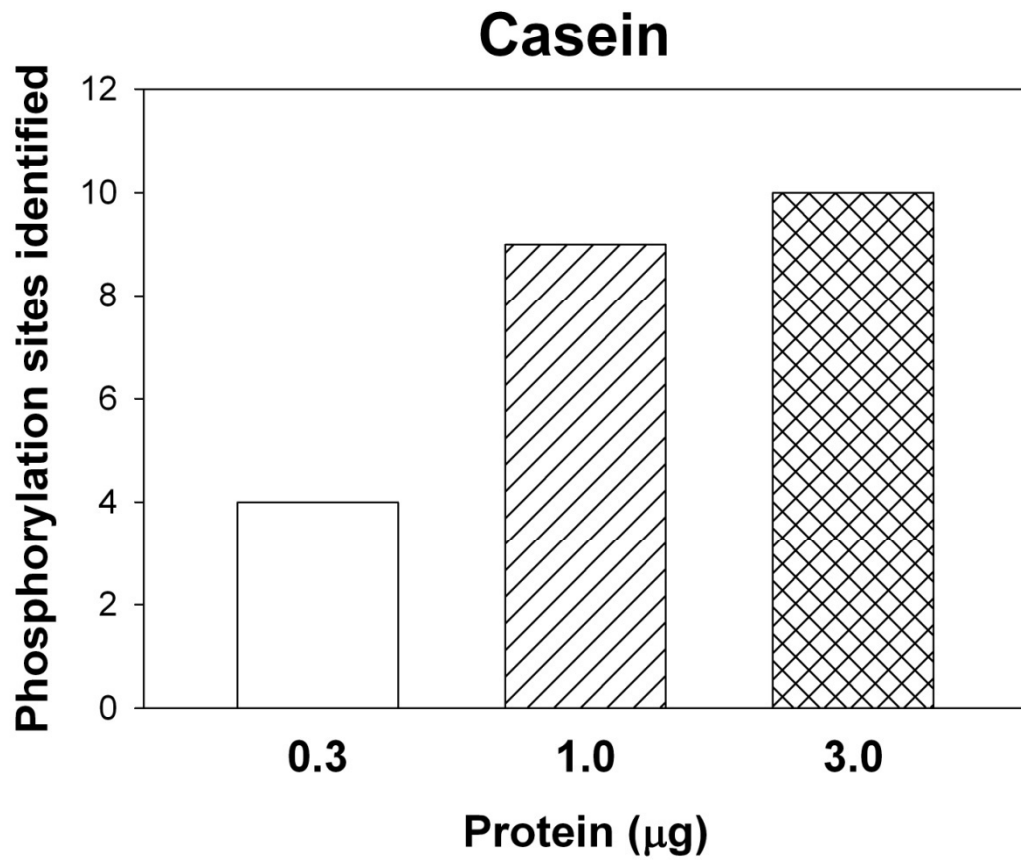

Figure S2

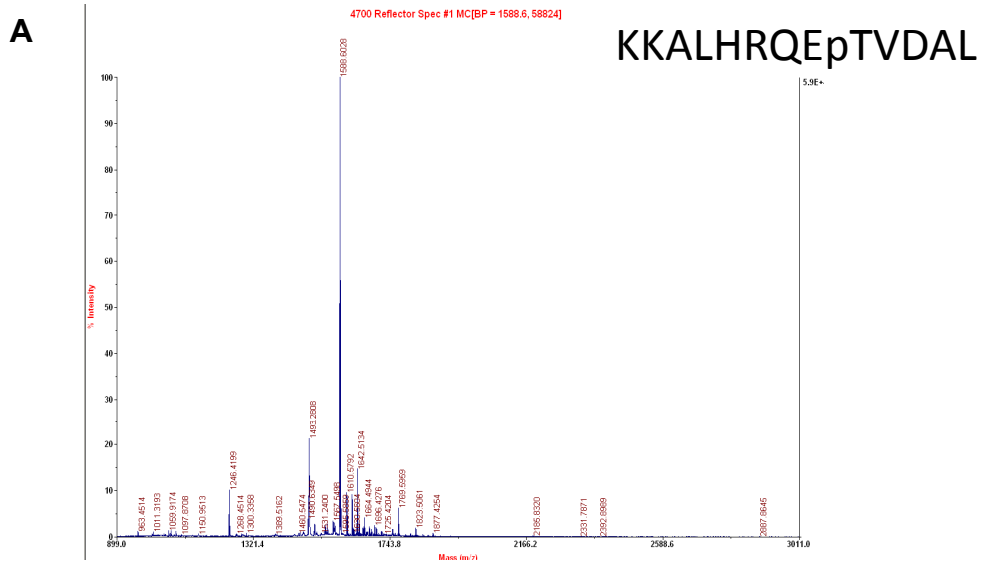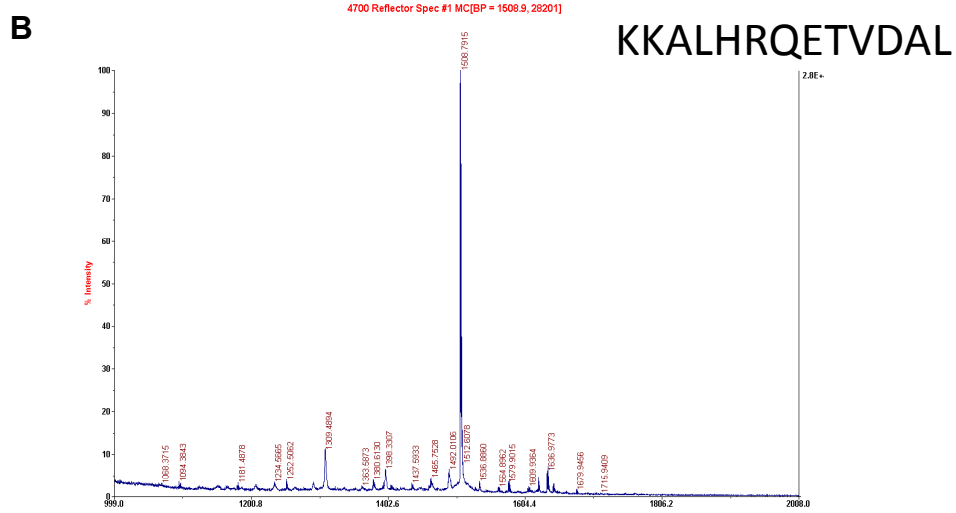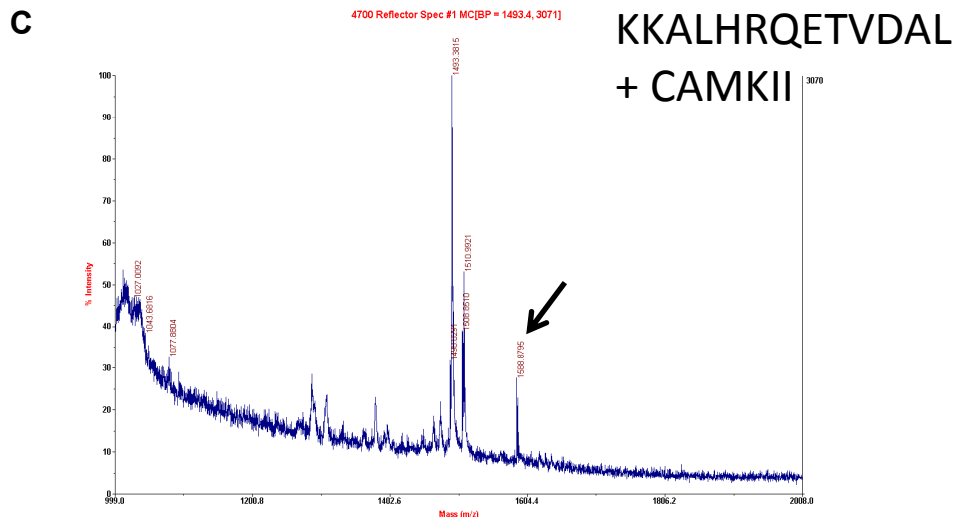

Figure S3

S325, S328

RT: 0.00 - 82.03

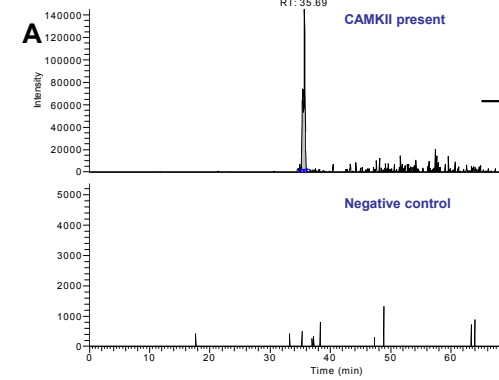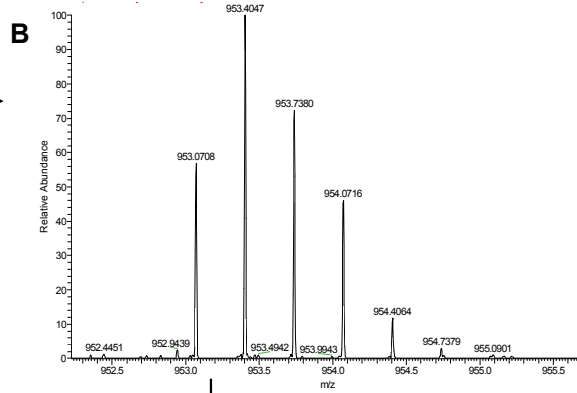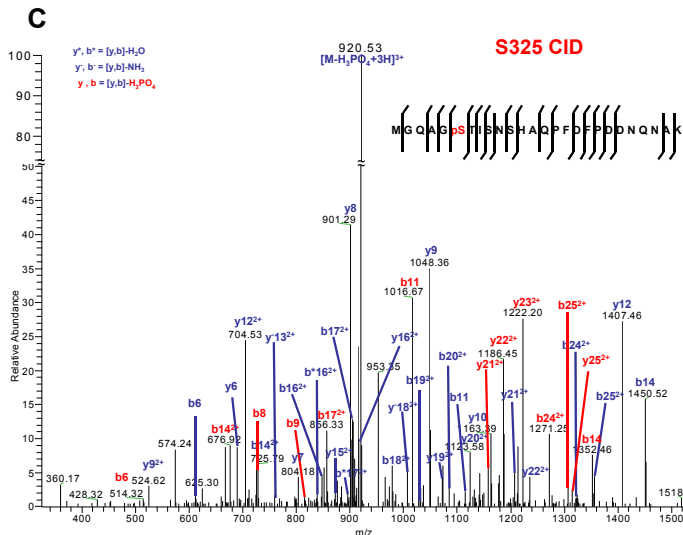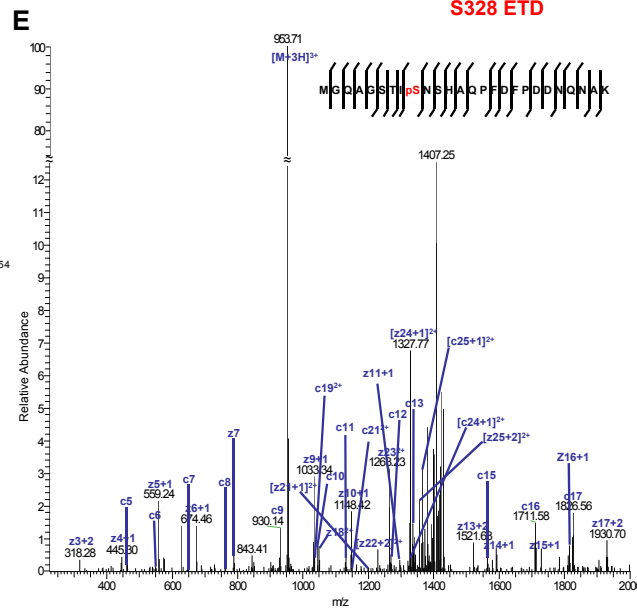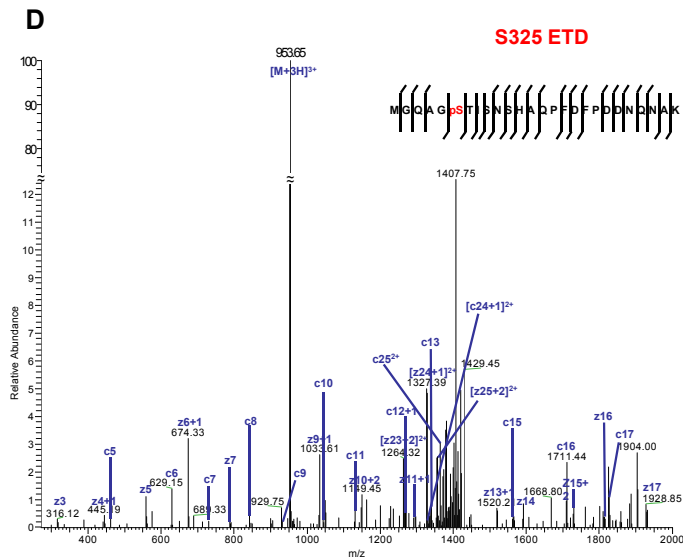

Figure S4

# S306 phosphorylation by CK1

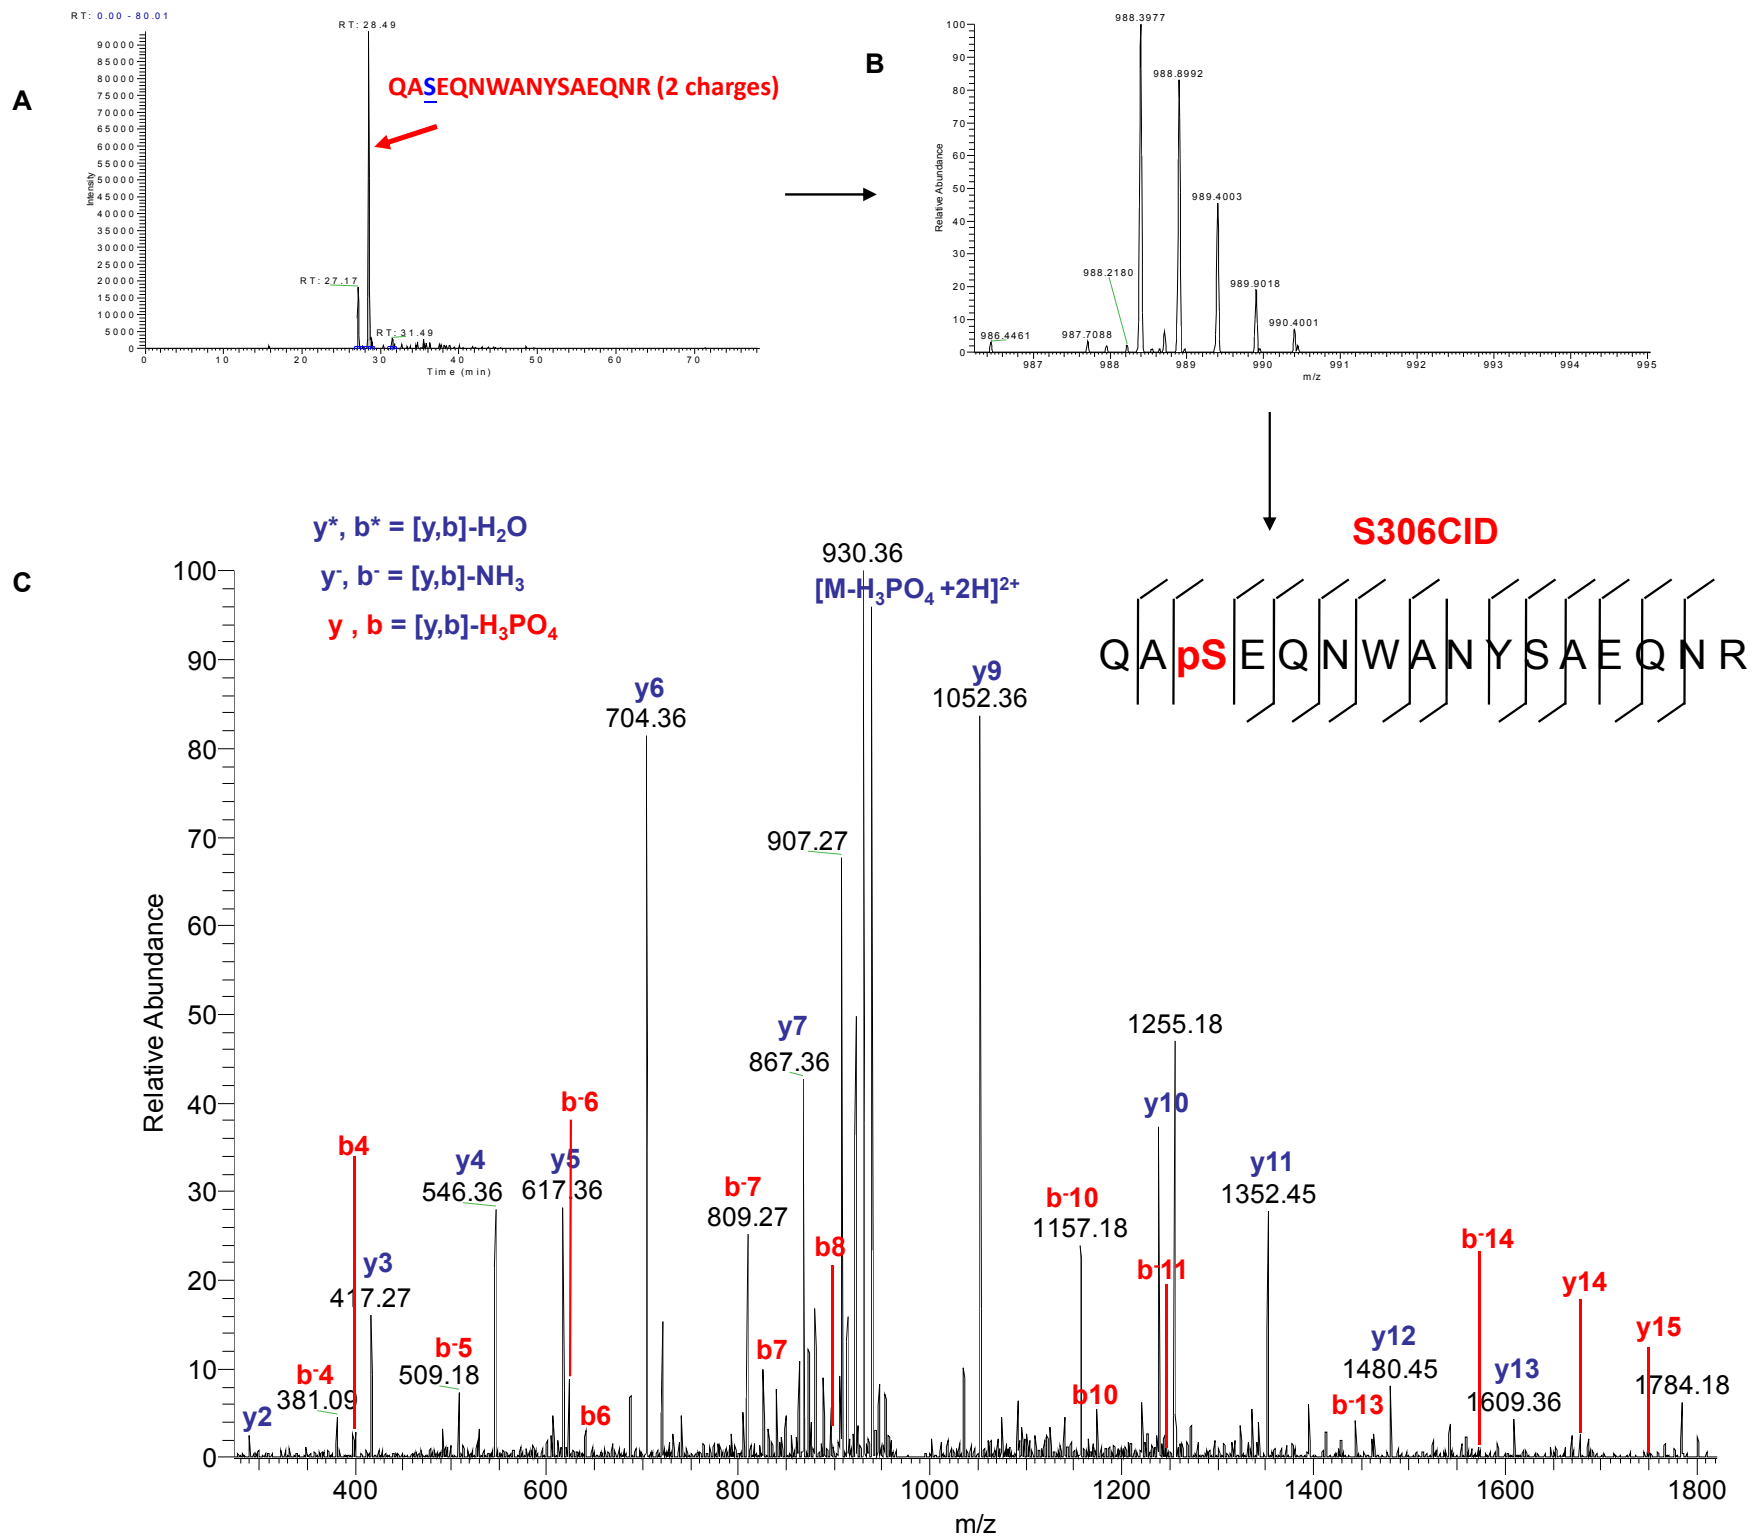





Figure S6

S296, S297

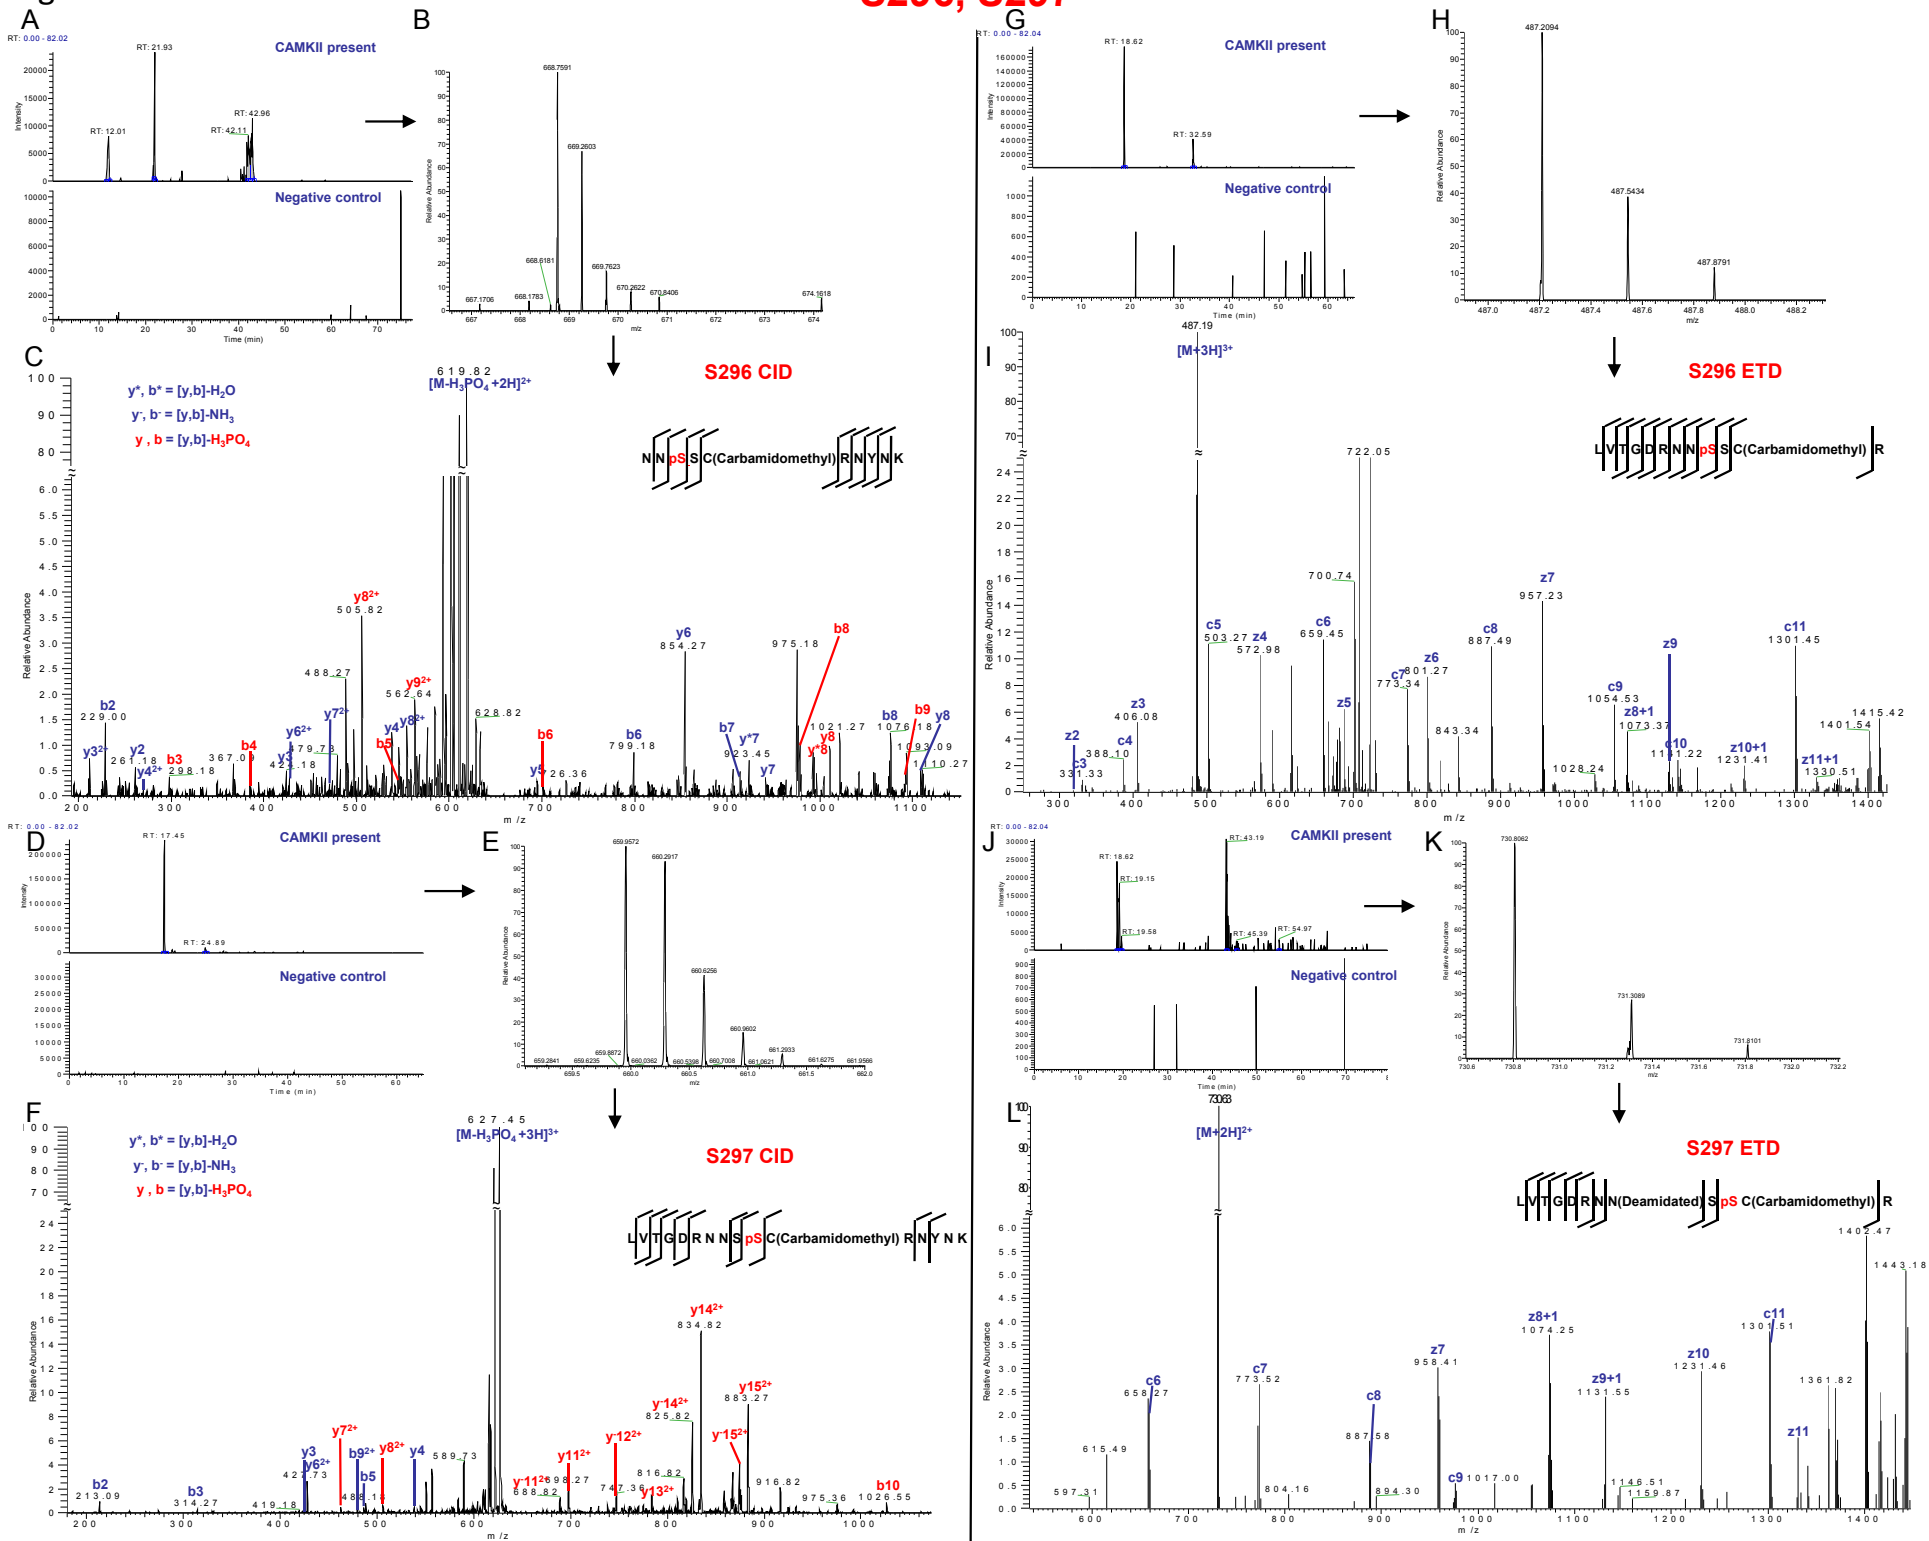

Figure S7

**S364, S365**

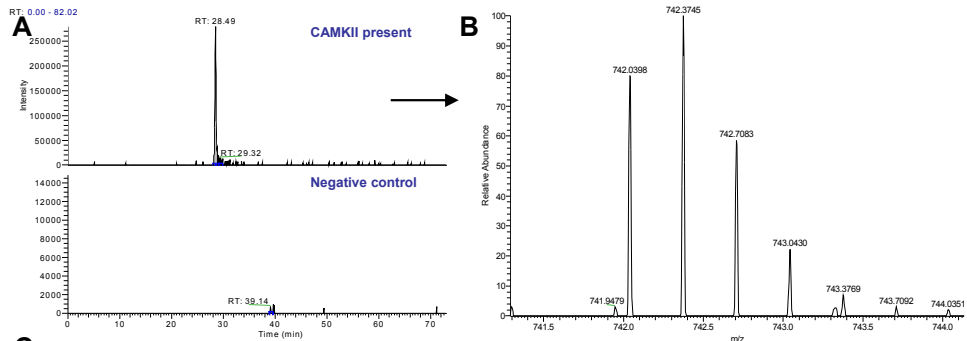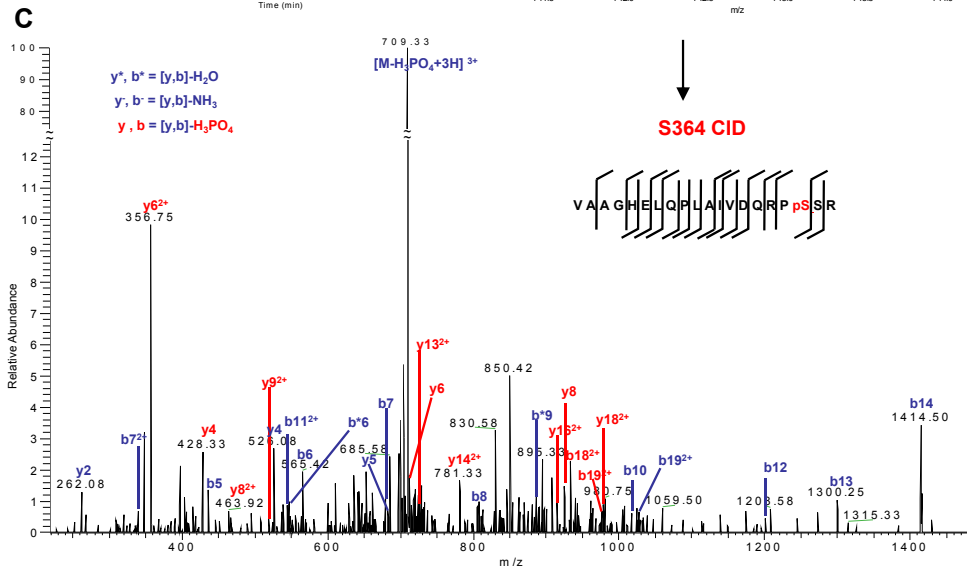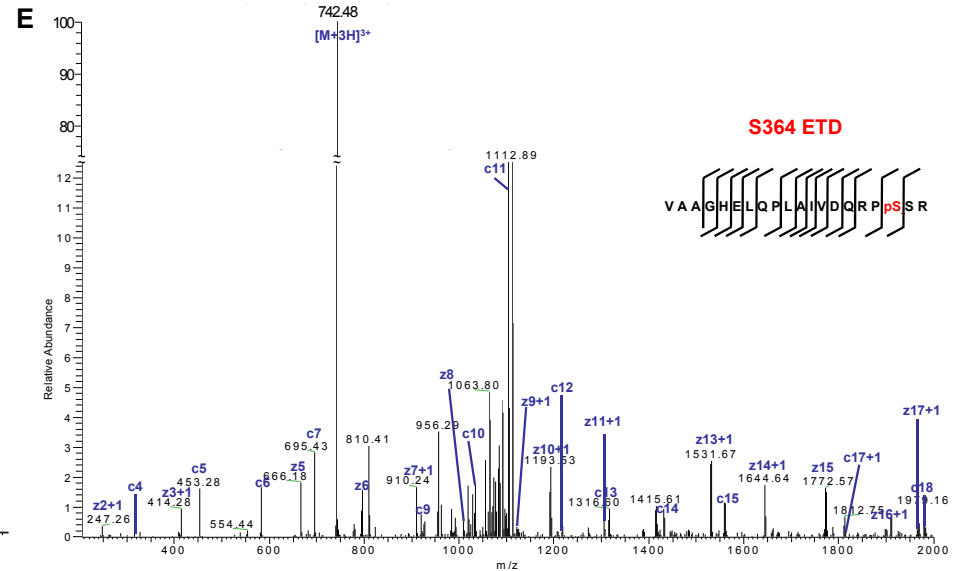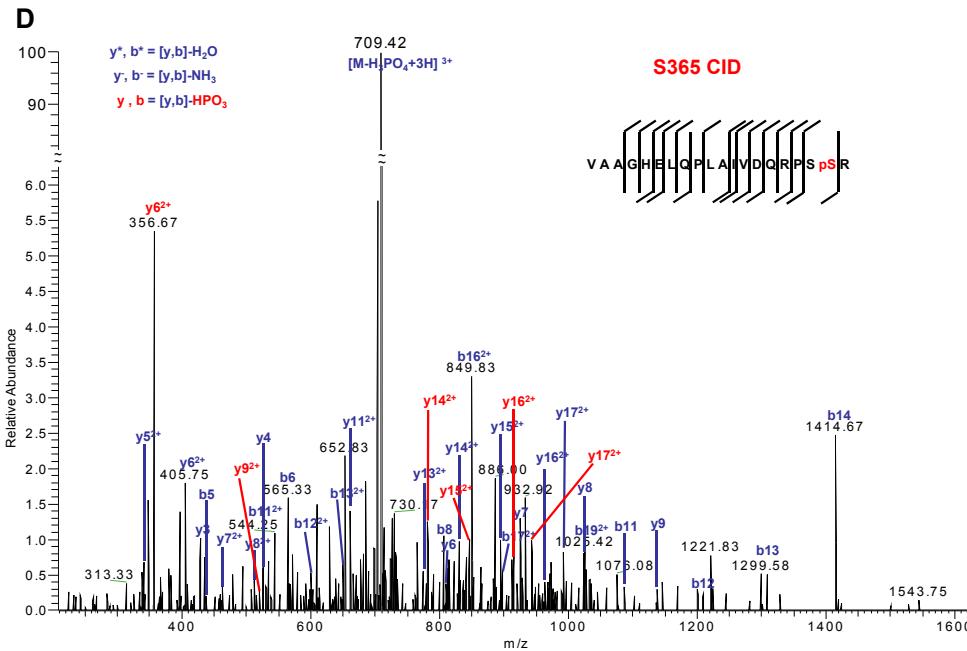

Figure S8

S369, S372, S373

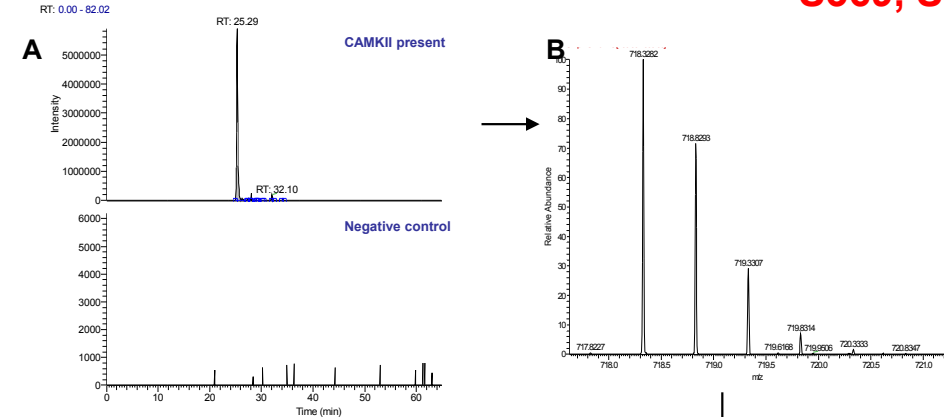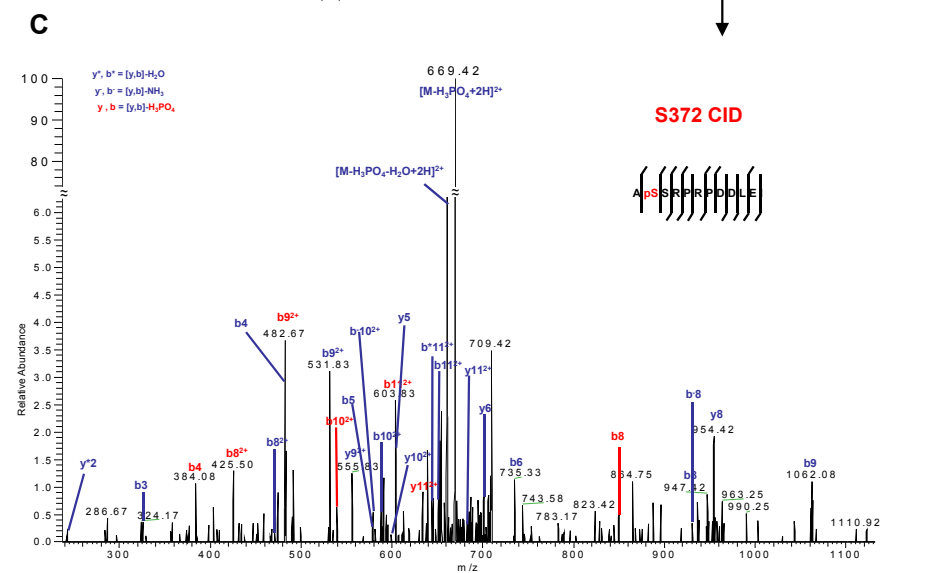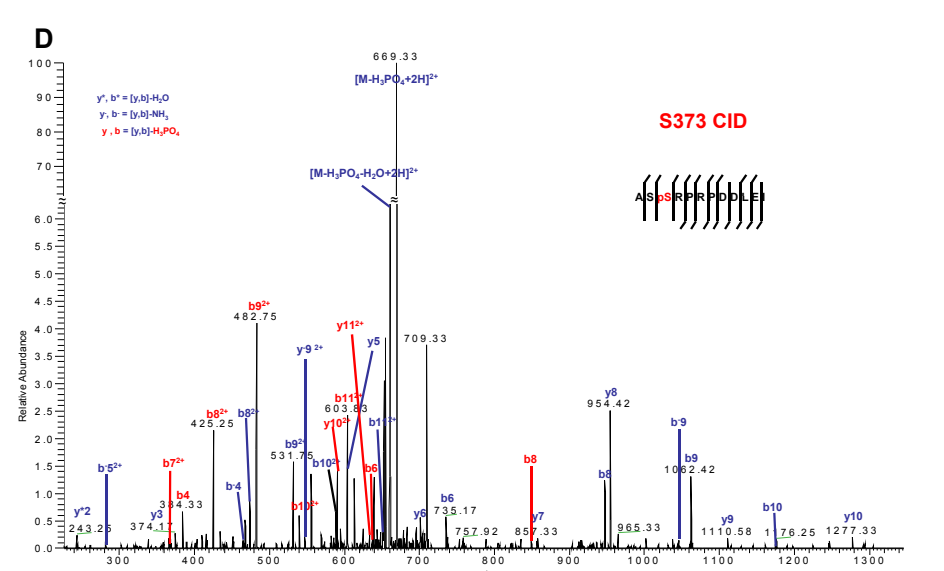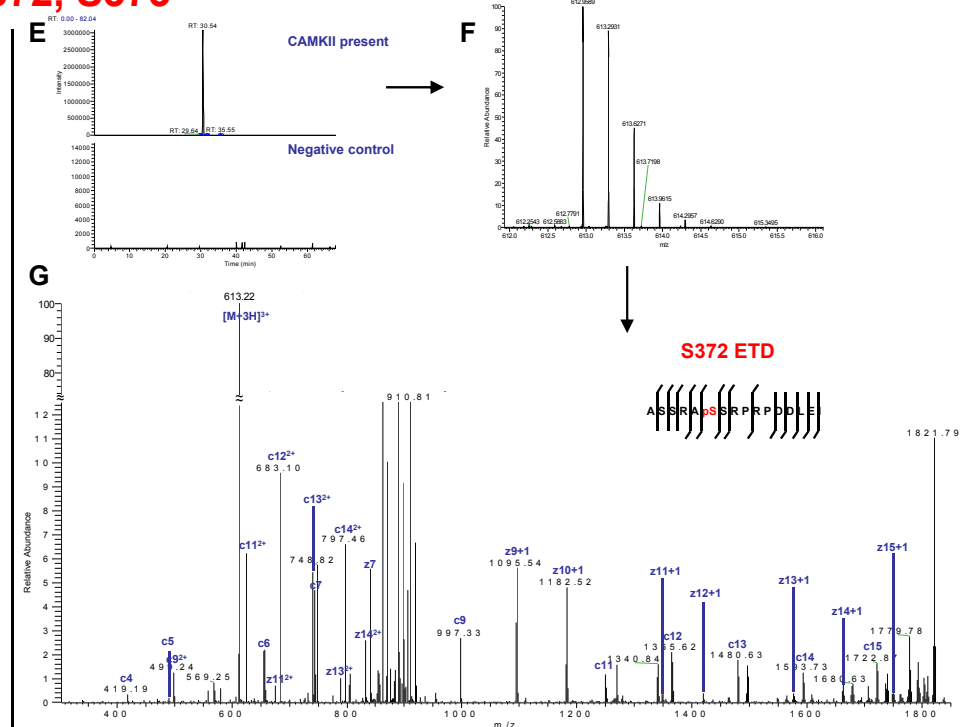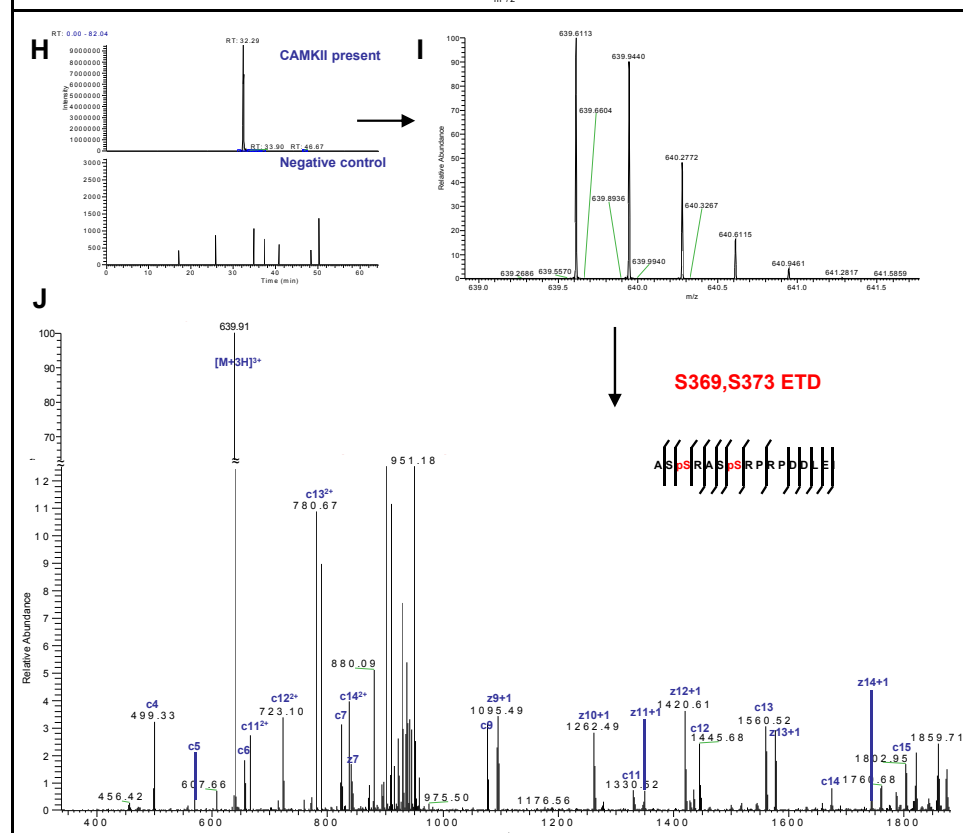

Figure S9

**S306**

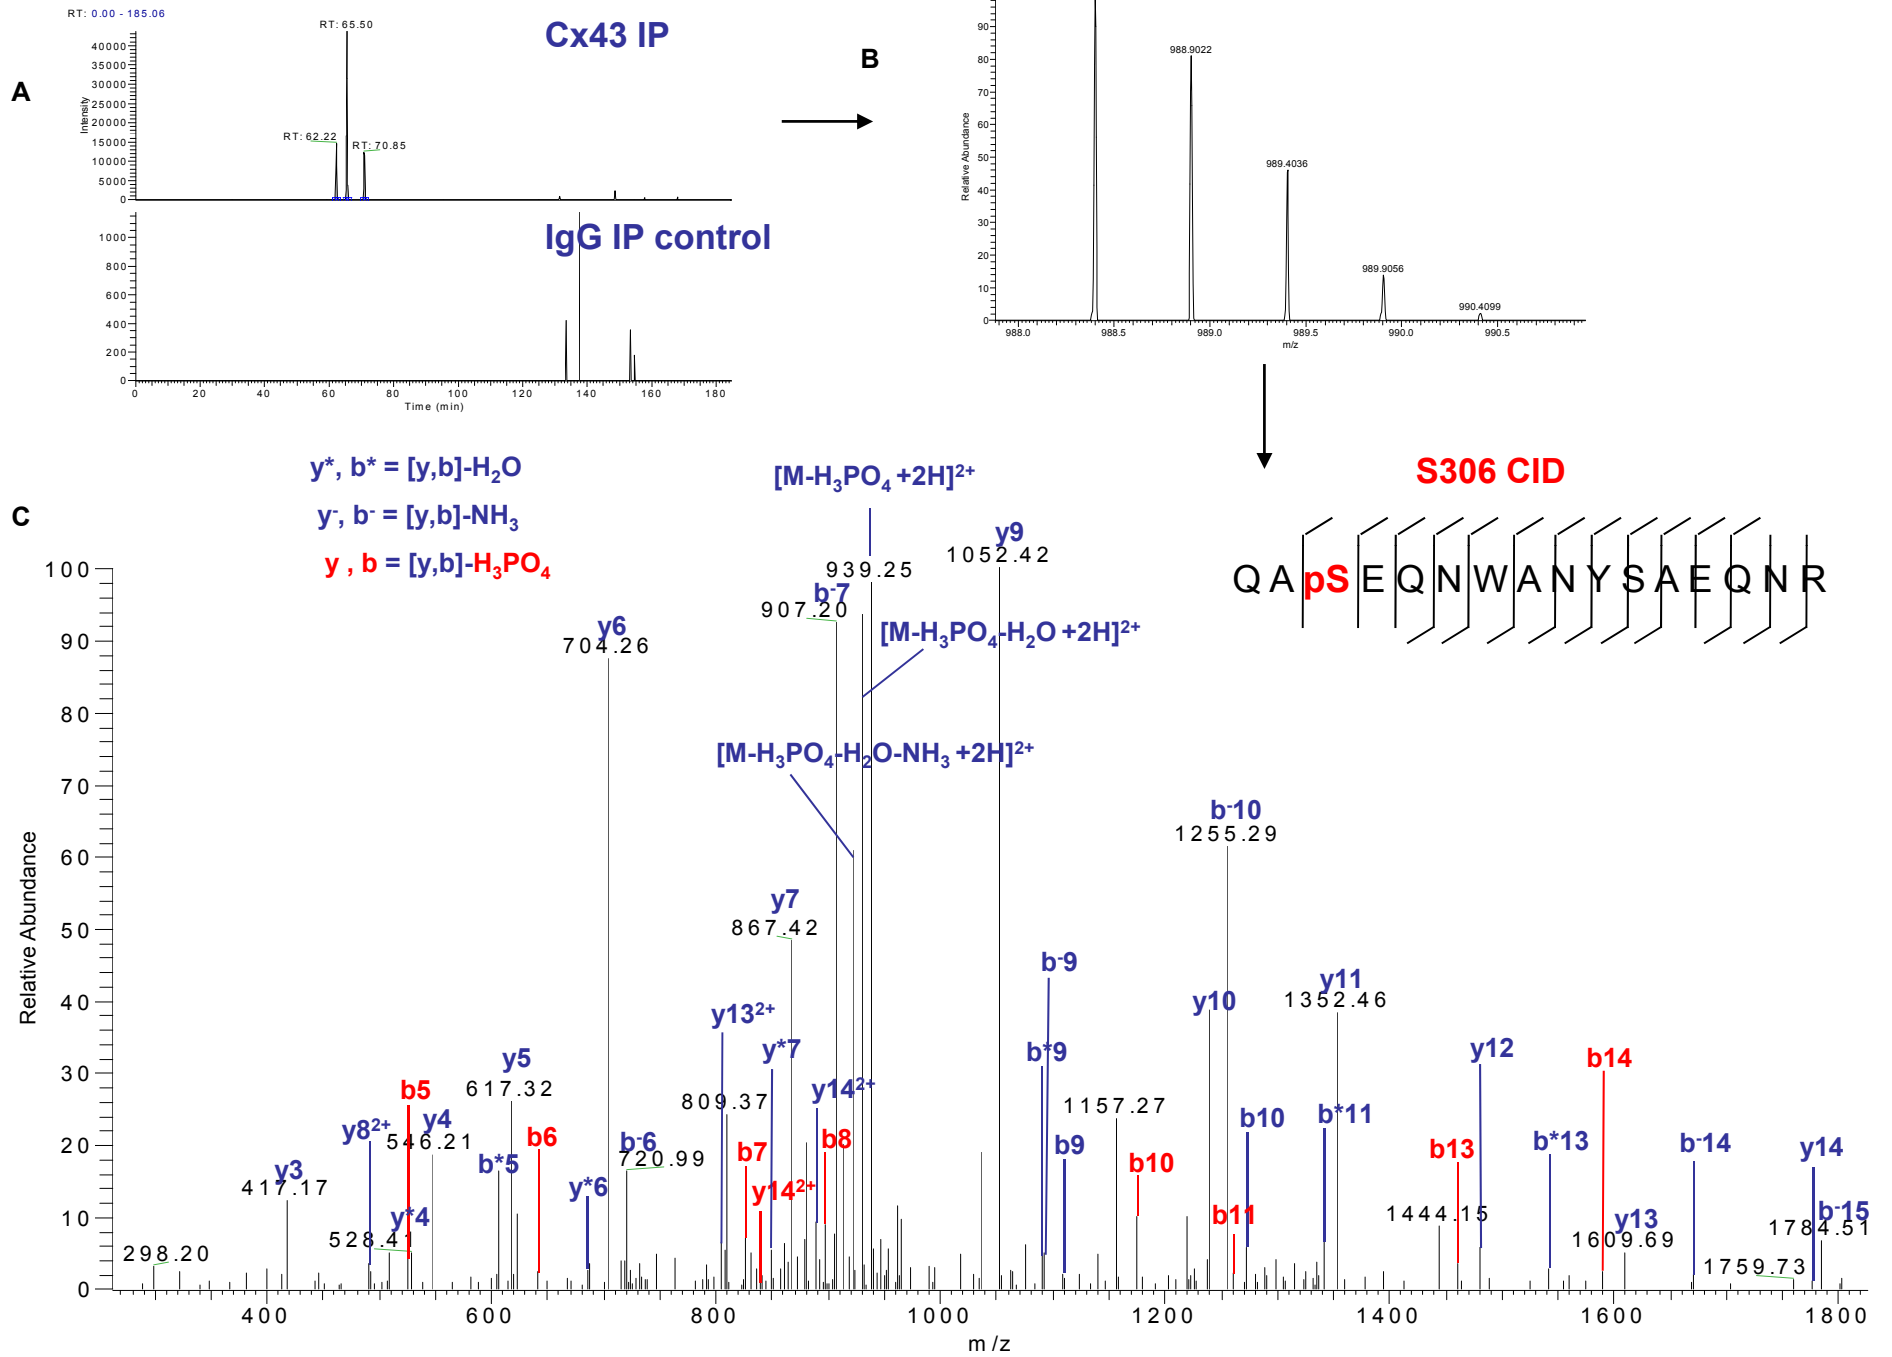



Supplemental Table S1. Complete list of phosphorylated serine residues in each of four in vitro phosphorylation experiments.

| Experiment         | Condition                                                                           | Serine residues phosphorylated |                |                |                |                |                |                |               |               |               |               |                |                |               |                   |
|--------------------|-------------------------------------------------------------------------------------|--------------------------------|----------------|----------------|----------------|----------------|----------------|----------------|---------------|---------------|---------------|---------------|----------------|----------------|---------------|-------------------|
|                    |                                                                                     | S244<br>(novel)                | S255<br>(MAPK) | S257<br>(no K) | S296<br>(no K) | S297<br>(no K) | S306<br>(no K) | S314<br>(no K) | S325<br>(CK1) | S328<br>(CK1) | S330<br>(CK1) | S364<br>(PKA) | S365<br>(PKA?) | S369<br>(PKA?) | S372<br>(PKC) | S373<br>(PKA,Akt) |
| 1 (CID only)       | CAMKII                                                                              | <b>a</b>                       | <b>a</b>       | <b>a</b>       | ✓              | ✓              | ✓              | <b>b</b>       | <b>a</b>      | <b>a</b>      | <b>a</b>      | ×             | ×              | <b>a</b>       | <b>a</b>      | <b>a</b>          |
|                    | control                                                                             | ×                              | ×              | ×              | ×              | ×              | ×              | ×              | ×             | ×             | ×             | ×             | ×              | ×              | ×             | ×                 |
| 2 (CID only)       | CAMKII                                                                              | ✓                              | ✓              | ✓              | ×              | ×              | ✓              | <b>b</b>       | ✓***          | <b>b</b>      | <b>b</b>      | ✓             | ✓              | ×              | ✓             | ✓                 |
|                    | control                                                                             | ×                              | ×              | ×              | ×              | ×              | ×              | ×              | ×             | ×             | ×             | ×             | ×              | ×              | ×             | ×                 |
| 3 (CID and<br>ETD) | CAMKII                                                                              | ✓                              | ✓              | ✓              | ✓**            | <b>b</b>       | ✓              | ✓              | ✓             | ✓**           | ✓*            | ✓**           | <b>b</b>       | ✓**            | ✓***          | ✓**               |
|                    | control                                                                             | n.d.                           | n.d.           | n.d.           | n.d.           | n.d.           | n.d.           | n.d.           | n.d.          | n.d.          | n.d.          | n.d.          | n.d.           | n.d.           | n.d.          | n.d.              |
| 4 (CID and<br>ETD) | CAMKII                                                                              | ✓                              | ✓**            | ✓              | ✓**            | ✓**            | ✓              | ✓              | ✓             | ✓**           | ✓             | ✓             | <b>b</b>       | ✓**            | ✓**           | ✓**               |
|                    | control                                                                             | ×                              | ×              | ×              | ×              | ×              | ×              | ×              | ×             | ×             | ×             | ×             | ×              | ×              | ×             | ×                 |
| (novel)            | Novel phosphorylation site identified                                               |                                |                |                |                |                |                |                |               |               |               |               |                |                |               |                   |
| (no K)             | No kinase previously reported as being responsible for phosphorylating this residue |                                |                |                |                |                |                |                |               |               |               |               |                |                |               |                   |
| (*CAMKII?)         | CAMKII consensus sequence RXXS <sup>47-49</sup>                                     |                                |                |                |                |                |                |                |               |               |               |               |                |                |               |                   |
| <b>a</b>           | MS spectrum was found, but no MS2 triggered                                         |                                |                |                |                |                |                |                |               |               |               |               |                |                |               |                   |
| <b>b</b>           | MS spectrum was found, but MS2 spectrum indicates other phosphorylated site         |                                |                |                |                |                |                |                |               |               |               |               |                |                |               |                   |
| ✓                  | Both MS and MS2 spectra were confirmed                                              |                                |                |                |                |                |                |                |               |               |               |               |                |                |               |                   |
| ✓*                 | Unique to CID                                                                       |                                |                |                |                |                |                |                |               |               |               |               |                |                |               |                   |
| ✓**                | Unique to ETD                                                                       |                                |                |                |                |                |                |                |               |               |               |               |                |                |               |                   |
| ✓***               | Not identified by MASCOT                                                            |                                |                |                |                |                |                |                |               |               |               |               |                |                |               |                   |
| ×                  | Neither MS nor MS2 spectra were found                                               |                                |                |                |                |                |                |                |               |               |               |               |                |                |               |                   |
| n.d.               | Not done                                                                            |                                |                |                |                |                |                |                |               |               |               |               |                |                |               |                   |

Supplemental Table S2. Fragmentation ions for peptide containing S306.

Cx43-36 #3118 @988.39 CID

**S306 CID** b [b-NH3] [b-H3PO4] y y2+ [y-H3PO4]2+ [y-NH3] [y-NH3]2+ [y-H2O]2+  
in figure as: b b- b y y2+ y2+ y- y-2+

| Q |                      |                      |                      |                      |                    |                    |                      |                    |                    |
|---|----------------------|----------------------|----------------------|----------------------|--------------------|--------------------|----------------------|--------------------|--------------------|
| A | 200.10               | 183.08               |                      | 1847.73              | 924.37             | 875.38             | 1830.71              | 915.86             | 915.37             |
| S | 367.10               | 350.07               | 269.12               | 1776.70<br>(1776.43) | 888.85<br>(888.67) | 839.86<br>(839.86) | 1759.67              | 880.34<br>(880.31) | 879.85<br>(879.44) |
| E | 496.14               | 479.12               | 398.17               | 1609.70<br>(1609.47) | 805.35             |                    | 1592.67              | 796.84             | 796.35             |
| Q | 624.20               | 607.18<br>(607.12)   | 526.22               | 1480.66<br>(1480.52) | 740.83<br>(740.77) |                    | 1463.63<br>(1463.62) | 732.32             | 731.83             |
| N | 738.25               | 721.22<br>(721.19)   | 640.27               | 1352.60<br>(1352.47) | 676.80             |                    | 1335.57<br>(1335.54) | 668.29             | 667.80             |
| W | 924.32<br>(924.11)   | 907.30<br>(907.09)   | 826.35<br>(826.26)   | 1238.55<br>(1238.44) | 619.78             |                    | 1221.53<br>(1221.29) | 611.27             | 610.78             |
| A | 995.36               | 978.34               | 897.39<br>(897.40)   | 1052.48<br>(1052.42) | 526.74             |                    | 1035.45<br>(1035.37) | 518.23             | 517.74             |
| N | 1109.40<br>(1109.40) | 1092.38              | 1011.43              | 981.44               | 491.22             |                    | 964.41<br>(964.33)   | 482.71             | 482.22             |
| Y | 1272.47<br>(1272.35) | 1255.44<br>(1255.28) | 1174.49<br>(1174.47) | 867.40<br>(867.29)   | 434.20             |                    | 850.37               | 425.69             | 425.20             |
| S | 1359.50<br>(1359.97) | 1342.47              | 1261.52<br>(1261.35) | 704.33<br>(704.31)   | 352.67             |                    | 687.31<br>(687.49)   | 344.16             | 343.66             |
| A | 1430.54              | 1413.51              | 1332.56<br>(1332.21) | 617.30<br>(617.37)   | 309.15             |                    | 600.27<br>(600.35)   | 300.64             | 300.15             |
| E | 1559.58              | 1542.55              | 1461.60              | 546.26<br>(546.28)   | 273.64             |                    | 529.24               | 265.12             | 264.63             |
| Q | 1687.64              | 1670.61              | 1589.66              | 417.22<br>(417.32)   | 209.11             |                    | 400.19               | 200.60             |                    |
| N | 1801.68<br>(1801.61) | 1784.65<br>(1784.32) | 1703.70              | 289.16               | 145.08             |                    | 272.14               | 136.57             |                    |
| R |                      |                      |                      | 175.12               | 88.06              |                    | 158.10               | 79.55              |                    |

|                |        |
|----------------|--------|
| [M+2H]2+       | 988.19 |
| [M-H3PO4+2H]2+ | 939.36 |

|                                |                         |
|--------------------------------|-------------------------|
| Yellow:                        | Low&High mass cut off   |
| Red:                           | Relative intensity >1.0 |
| Theoretical m/z (Observed m/z) |                         |

Cx43-36 (11102009) #3941 @659.27 ETD

MASCOT score: 33

**S306 ETD** c [c+1] z [z+1] [z+2]  
in figure as: c c+1 z z+1

| Q |                      |                      |                      |                      |                      |
|---|----------------------|----------------------|----------------------|----------------------|----------------------|
| A | 217.13<br>(217.22)   | 218.13               | 1831.72<br>(1831.79) | 1832.72<br>(1832.74) | 1833.73<br>(1833.57) |
| S | 384.13<br>(384.21)   | 385.13               | 1760.68<br>(1760.55) | 1761.69<br>(1761.57) | 1762.69<br>(1762.48) |
| E | 513.17<br>(513.35)   | 514.17<br>(514.39)   | 1593.68<br>(1593.57) | 1594.69<br>(1594.60) | 1595.69<br>(1595.73) |
| Q | 641.23<br>(641.17)   | 642.23<br>(642.31)   | 1464.64<br>(1464.40) | 1465.65<br>(1465.57) | 1466.65<br>(1466.74) |
| N | 755.27<br>(755.31)   | 756.28<br>(756.16)   | 1336.58<br>(1336.38) | 1337.59<br>(1337.49) | 1338.59<br>(1338.65) |
| W | 941.35<br>(941.40)   | 942.35<br>(942.40)   | 1222.54<br>(1222.39) | 1223.54<br>(1223.80) | 1224.55              |
| A | 1012.39<br>(1012.32) | 1013.39<br>(1013.37) | 1036.46<br>(1036.37) | 1037.46<br>(1037.23) | 1038.47              |
| N | 1126.43<br>(1126.33) | 1127.43<br>(1127.40) | 965.42               | 966.43<br>(966.26)   | 967.43               |
| Y | 1289.49<br>(1289.31) | 1290.5<br>(1290.39)  | 851.38<br>(851.29)   | 852.38<br>(852.33)   | 853.39               |
| S | 1376.53<br>(1376.52) | 1377.53<br>(1377.44) | 688.31<br>(688.29)   | 689.32<br>(689.35)   | 690.32<br>(690.42)   |
| A | 1447.56<br>(1447.41) | 1448.57<br>(1448.41) | 601.28<br>(601.21)   | 602.29               | 603.29               |
| E | 1576.61<br>(1576.45) | 1577.61<br>(1577.46) | 530.24<br>(530.28)   | 531.25               | 532.26               |
| Q | 1704.67<br>(1704.63) | 1705.67<br>(1705.53) | 401.2<br>(401.17)    | 402.21<br>(402.36)   | 403.21               |
| N | 1818.71<br>(1818.56) | 1819.71<br>(1819.54) | 273.14               | 274.15               | 275.15               |
| R |                      |                      | 159.1                | 160.11               | 161.11               |

|          |       |
|----------|-------|
| [M+3H]3+ | 659.5 |
|----------|-------|

|                                |                         |
|--------------------------------|-------------------------|
| Yellow:                        | Low&High mass cut off   |
| Red:                           | Relative intensity >0.4 |
| Theoretical m/z (Observed m/z) |                         |



Supplemental Table S3. Fragmentation ions for peptide containing S325, S328 and S330.

Cx43-36 #3600 @953.07 CID  
S325 CID

| M | b       | b+2     | [b-H2O] <sup>+</sup> | [b-H3PO4] <sup>+</sup> | [b-H3PO4] <sup>2+</sup> | y                  | y+2                  | [y-H3PO4] <sup>+</sup> | [y-NH3] <sup>+</sup> | [y-NH3] <sup>2+</sup> | [y-H2O] <sup>+</sup> |
|---|---------|---------|----------------------|------------------------|-------------------------|--------------------|----------------------|------------------------|----------------------|-----------------------|----------------------|
| G | 189.07  |         |                      |                        |                         | 2726.15            | 1363.58              | 1314.59<br>(1314.79)   | 2708.12              | 1355.06               | 2708.14              |
| Q | 317.13  |         |                      |                        |                         | 2669.13            | 1335.07              | 1286.08                | 2652.10              | 1326.55               | 2651.12              |
| A | 388.16  |         |                      |                        |                         | 2541.07            | 1271.04              | 1222.05<br>(1223.39)   | 2524.04              | 1262.52               | 2523.06              |
| G | 445.19  |         |                      |                        |                         | 2470.03            | 1235.52<br>(1235.39) | 1198.53<br>(1198.45)   | 2453.00              | 1227.01               | 2452.02              |
| S | 612.18  |         | 514.21<br>(514.32)   |                        |                         | 2413.01            | 1207.01<br>(1207.05) | 1158.02<br>(1158.29)   | 2395.98              | 1198.50               | 2395.00              |
| T | 713.23  |         |                      |                        |                         | 2246.01            | 1123.51<br>(1123.58) |                        | 2228.98              | 1115.00               | 2228.00              |
| I | 826.32  |         | 728.34<br>(728.23)   |                        |                         | 2144.96            | 1072.99<br>(1072.74) |                        | 2127.94              | 1064.47               | 2126.95              |
| S | 913.35  |         |                      |                        |                         | 2031.88            | 1016.44              |                        | 2014.85              | 1007.93<br>(1007.59)  | 2013.87              |
| N | 1027.39 |         |                      |                        |                         | 1925.41            |                      |                        | 1904.44              | 994.41                | 1902.74              |
| S | 1114.42 |         |                      |                        |                         | 1830.80            | 915.91<br>(915.96)   |                        | 1813.78              | 907.39<br>(907.15)    | 1812.79              |
| H | 1251.48 | 628.24  | 617.24               | 1153.51                | 577.28                  | 1743.77            | 872.39<br>(872.18)   |                        | 1728.75              | 863.88                | 1725.76              |
| A | 1322.52 | 661.76  | 652.76               | 1224.54                | 612.77                  | 1606.71            | 803.86               |                        | 1589.69              | 795.35                | 1588.70              |
| Q | 1450.58 | 725.79  | 716.79               | 1352.80                | 676.80                  | 1535.68            | 768.34               |                        | 1518.65              | 759.83                | 1517.67              |
| P | 1547.63 | 774.32  | 765.31               | 1449.85                | 725.33                  | 1407.62            | 704.31<br>(704.53)   |                        | 1390.59              | 695.80                | 1389.61              |
| F | 1694.70 | 847.85  | 838.85               | 1596.72                | 798.86                  | 1310.56            | 665.79               |                        | 1293.44              | 647.27                | 1292.55              |
| D | 1809.73 | 905.37  | 896.36               | 1711.75                | 856.38                  | 1163.50            | 582.25               |                        | 1146.47              | 573.74                | 1145.49              |
| F | 1856.79 | 979.59  | 969.90               | 1858.82                | 929.91                  | 1048.47            | 524.74<br>(1048.38)  |                        | 1031.44              | 516.23                | 1030.46              |
| P | 2053.85 | 1027.43 | 1018.42              | 1955.87                | 978.44                  | 901.40<br>(901.20) | 451.20               |                        | 884.37               | 442.69                | 883.38<br>(883.42)   |
| D | 2168.87 | 1084.94 | 1075.94              | 2070.90                | 1035.95                 | 804.35<br>(804.18) | 402.68               |                        | 787.32               | 394.16                | 786.34               |
| D | 2283.90 | 1142.45 | 1133.45              | 2185.92                | 1093.47                 | 698.32<br>(698.37) | 345.16               |                        | 672.29               | 336.65                | 671.31               |
| N | 2387.94 | 1199.48 | 1190.47              | 2289.97                | 1150.49                 | 574.29             | 287.65               |                        | 557.27               | 279.14                |                      |
| Q | 2526.00 | 1263.51 | 1254.50              | 2428.03                | 1214.52                 | 460.25             | 230.63               |                        | 443.22               | 222.12                |                      |
| N | 2640.05 | 1320.53 | 1311.52              | 2542.07                | 1271.54                 | 332.19             | 166.60               |                        | 315.17               | 158.09                |                      |
| A | 2711.08 | 1386.05 | 1347.04              | 2613.11                | 1307.06                 | 218.15             | 109.58               |                        | 201.12               | 101.07                |                      |
| K |         |         |                      |                        |                         | 147.11             | 74.06                |                        | 130.09               | 65.55                 |                      |

[M+3H]<sup>3+</sup> 920.53  
[M+3PO4-NH3+3H]<sup>3+</sup> 914.76  
[M+3PO4-NH3-H2O+3H]<sup>3+</sup> 908.63

Yellow: Low&High mass cut off  
Red: Relative intensity >1.5  
Theoretical m/z (Observed m/z)

Cx43-36 (11102009) #4643 @953.07 ETD  
S325 ETD

MASCOT score: 55

| M | c       | c+2     | [c+1]   | [c+1] <sup>2+</sup> | [c+2] <sup>2+</sup> | z                   | [z+1]   | [z+1] <sup>2+</sup>  | [z+2]   | [z+2] <sup>2+</sup>  |
|---|---------|---------|---------|---------------------|---------------------|---------------------|---------|----------------------|---------|----------------------|
| G | 206.10  |         |         |                     |                     | 2710.13             | 2711.14 | 1355.07              | 2712.14 | 1356.57<br>(1356.79) |
| Q | 334.15  |         |         |                     |                     | 2653.11             | 2654.12 | 1327.56<br>(1327.39) | 2655.12 | 1328.06<br>(1328.69) |
| A | 405.19  |         |         |                     |                     | 2525.05             | 2526.06 | 1263.53<br>(1263.58) | 2527.06 | 1264.30<br>(1264.30) |
| G | 462.21  |         |         |                     |                     | 2454.01             | 2455.02 | 1228.01              | 2456.02 | 1228.52              |
| S | 629.21  |         |         |                     |                     | 2396.99             | 2398.00 | 1199.50              | 2399.00 | 1199.50              |
| T | 730.26  |         |         |                     |                     | 2229.99             | 2231.00 | 1116.00              | 2232.00 | 1116.00              |
| I | 843.34  |         |         |                     |                     | 2128.94             | 2129.95 | 1065.48              | 2130.96 | 1065.98              |
| S | 930.38  |         |         |                     |                     | 2015.86             | 2016.87 | 1008.94              | 2017.87 | 1009.44              |
| N | 1044.42 |         |         |                     |                     | 1926.83             | 1927.84 | 955.42               | 1928.84 | 955.92               |
| S | 1131.45 |         |         |                     |                     | 1814.79             | 1815.79 | 908.40               | 1816.80 | 908.90               |
| S | 1131.21 |         |         |                     |                     | 1814.41             | 1815.86 | 908.40               | 1816.79 | 908.90               |
| H | 1268.51 | 634.76  | 1269.51 | 635.26              | 635.76              | 1727.75             | 1728.76 | 864.88               | 1729.76 | 865.39               |
| A | 1339.55 | 670.28  | 1340.55 | 670.78              | 671.28              | 1590.69             | 1591.69 | 865.39               | 1592.69 | 865.39               |
| Q |         |         |         |                     |                     | 1519.66             | 1520.67 | 759.83               | 1521.67 | 759.83               |
| P | 1564.66 | 782.83  | 1565.66 | 783.33              | 783.84              | 1294.55             | 1295.55 | 783.33               | 1296.55 | 783.33               |
| F | 1711.73 | 856.37  | 1712.73 | 856.87              | 857.37              | 1204.55             | 1205.55 | 783.33               | 1206.55 | 783.33               |
| D | 1826.75 | 913.88  | 1827.75 | 914.38              | 914.88              | 1147.48             | 1148.49 | 783.33               | 1149.49 | 783.33               |
| F |         |         |         |                     |                     | 1032.45             | 1033.46 | 665.80               | 1034.46 | 665.80               |
| P | 2070.87 | 1035.94 | 2071.88 | 1036.44             | 1036.94             | 884.37              | 885.37  | 783.33               | 886.37  | 783.33               |
| D | 2185.90 | 1093.45 | 2186.90 | 1093.96             | 1094.46             | 783.33<br>(788.25)  | 789.34  | 790.34               | 791.34  | 790.34               |
| D | 2300.93 | 1150.97 | 2301.93 | 1151.47             | 1151.97             | 674.31<br>(674.33)  | 675.31  | 676.31               | 677.31  | 675.31               |
| N | 2414.97 | 1207.99 | 2415.97 | 1208.49             | 1208.99             | 558.28              | 559.28  | 560.28               | 561.28  | 559.28               |
| Q | 2543.03 | 1272.02 | 2544.03 | 1272.52             | 1273.02             | 444.23<br>(445.19)  | 445.24  | 446.24               | 447.24  | 445.24               |
| A | 2728.11 | 1364.56 | 1365.56 | 1366.06             | 1366.56             | 316.17<br>(1364.27) | 317.18  | 318.19               | 319.19  | 317.18               |
| K |         |         |         |                     |                     | 131.09              | 132.10  | 133.11               | 134.11  | 131.09               |

[M+3H]<sup>3+</sup> 953.63

Yellow: Low&High mass cut off  
Red: Relative intensity >2  
Theoretical m/z (Observed m/z)

Cx43-37 (11102009) #4643 @953.40 ETD  
S328 ETD

MASCOT score: 59

| M | c       | c+2     | [c+1]   | [c+1] <sup>2+</sup> | z                   | [z+1]                | [z+1] <sup>2+</sup> | [z+2]                | [z+2] <sup>2+</sup> |                      |
|---|---------|---------|---------|---------------------|---------------------|----------------------|---------------------|----------------------|---------------------|----------------------|
| G | 206.10  |         |         |                     | 2710.13             | 1355.57<br>(1355.68) | 2711.14             | 1356.07              | 2712.14             | 1356.57<br>(1356.59) |
| Q | 334.15  |         |         |                     | 2653.11             | 1327.56<br>(1326.81) | 2654.12             | 1327.77              | 2655.12             | 1328.06<br>(1328.63) |
| A | 405.19  |         |         |                     | 2525.05             | 1263.53<br>(1263.23) | 2526.06             | 1263.53<br>(1263.97) | 2527.06             | 1264.03<br>(1264.60) |
| G | 462.21  |         |         |                     | 2454.01             | 1227.51              | 2455.02             | 1228.01              | 2456.02             | 1228.52              |
| S | 549.25  |         |         |                     | 2386.99             | 1199.00              | 2398.00             | 1199.50              | 2399.00             | 1200.00              |
| T | 650.29  |         |         |                     | 2209.96             | 1155.48              | 2210.97             | 1155.99              | 2211.97             | 1156.49              |
| I | 763.38  |         |         |                     | 2008.91             | 1104.96              | 2009.92             | 1105.46              | 2010.92             | 1105.96              |
| S | 930.38  |         |         |                     | 1926.83             | 1048.42<br>(1048.33) | 1927.84             | 1048.92              | 1928.84             | 1049.42<br>(1049.34) |
| N | 1044.42 |         |         |                     | 1814.79             | 964.92               | 1815.79             | 965.42               | 1816.79             | 965.92               |
| S | 1131.45 |         |         |                     | 1814.79             | 907.90               | 1815.79             | 908.40               | 1816.79             | 908.90               |
| H | 1268.51 | 634.76  | 1269.51 | 635.26              | 1727.75             | 864.88               | 1728.76             | 865.39               | 1729.76             | 865.39               |
| A | 1339.55 | 670.28  | 1340.55 | 670.78              | 1590.69             | 865.39               | 1591.69             | 865.39               | 1592.69             | 865.39               |
| Q |         |         |         |                     | 1519.66             | 759.83               | 1520.67             | 759.83               | 1521.67             | 759.83               |
| P | 1564.66 | 782.83  | 1565.66 | 783.33              | 1294.55             | 783.33               | 1295.55             | 783.33               | 1296.55             | 783.33               |
| F | 1711.73 | 856.37  | 1712.73 | 856.87              | 1204.55             | 783.33               | 1205.55             | 783.33               | 1206.55             | 783.33               |
| D | 1826.75 | 913.88  | 1827.76 | 914.38              | 1147.48             | 783.33               | 1148.49             | 783.33               | 1149.49             | 783.33               |
| F |         |         |         |                     | 1032.45             | 665.80               | 1033.46             | 665.80               | 1034.46             | 665.80               |
| P | 2070.87 | 1035.94 | 2071.88 | 1036.44             | 884.37              | 783.33               | 885.37              | 783.33               | 886.37              | 783.33               |
| D | 2185.90 | 1093.45 | 2186.90 | 1093.96             | 783.33<br>(1035.55) | 789.34               | 790.34              | 791.34               | 792.34              | 790.34               |
| D | 2300.93 | 1150.97 | 2301.93 | 1151.47             | 674.31<br>(1150.85) | 675.31               | 676.31              | 677.31               | 678.31              | 675.31               |
| N | 2414.97 | 1207.99 | 2415.97 | 1208.49             | 558.28              | 559.28               | 560.28              | 561.28               | 562.28              | 559.28               |
| Q | 2543.03 | 1272.02 | 2544.03 | 1272.52             | 444.23<br>(1272.02) | 445.24               | 446.24              | 447.24               | 448.24              | 445.24               |
| A | 2728.11 | 1364.56 | 1365.56 | 1366.06             | 316.17<br>(1364.49) | 317.18               | 318.19              | 319.19               | 320.19              | 317.18               |
| K |         |         |         |                     | 131.09              | 132.10               | 133.11              | 134.11               | 135.11              | 131.09               |

[M+3H]<sup>3+</sup> 953.71

Yellow: Low&High mass cut off  
Red: Relative intensity >0.1  
Theoretical m/z (Observed m/z)

Cx43-37 #3442-4832 @953.73 CID  
S330 CID

| M             | b       | b+2    | [b-H2O] <sup>+</sup> | [b-H2O] <sup>2+</sup> | [b-NH3] <sup>+</sup> | [b-NH3] <sup>2+</sup> | [b-H3PO4] <sup>+</sup> | [b-H3PO4] <sup>2+</sup> | y       | y+2                  | [y-H3PO4] <sup>+</sup> | [y-NH3] <sup>+</sup> | [y-NH3] <sup>2+</sup> | [y-H2O] <sup>+</sup> |
|---------------|---------|--------|----------------------|-----------------------|----------------------|-----------------------|------------------------|-------------------------|---------|----------------------|------------------------|----------------------|-----------------------|----------------------|
| G             | 189.07  |        |                      |                       |                      |                       |                        |                         | 2728.12 | 1364.56              | 1315.57                | 2711.09              | 1356.05               | 2710.11              |
| Q             | 317.13  |        |                      |                       |                      |                       |                        |                         | 2671.09 | 1336.05              | 1287.06                | 2654.07              | 1327.54               | 2653.08              |
| A             | 388.16  |        |                      |                       |                      |                       |                        |                         | 2543.04 | 1272.02              | 1223.03<br>(1223.34)   | 2526.01              | 1263.51<br>(1263.85)  | 2525.03              |
| G             | 445.19  |        |                      |                       |                      |                       |                        |                         | 2472.00 | 1236.50              | 1187.51<br>(1236.65)   | 2454.97              | 1227.99               | 2453.99              |
| S             | 532.22  |        | 514.21<br>(514.19)   |                       |                      |                       |                        |                         | 2414.98 | 1207.99              | 1159.00<br>(1159.53)   | 2397.95              | 1199.48               | 2396.97              |
| T             | 633.27  |        |                      |                       | 616.24<br>(616.09)   |                       |                        |                         | 2327.95 | 1184.48              | 1115.49<br>(1115.49)   | 2310.92              | 1156.96               | 2309.93              |
| I             | 746.35  |        | 728.34<br>(728.14)   |                       |                      |                       |                        |                         | 2226.90 | 1113.95<br>(1113.88) | 1064.96<br>(1064.79)   | 2209.87              | 1105.44               | 2208.88              |
| S             | 833.38  |        |                      |                       |                      |                       |                        |                         | 2113.81 | 1057.41<br>(1057.72) | 1008.42<br>(1008.40)   | 2096.79              | 1048.90<br>(1048.30)  | 2095.80              |
| N(Deamidated) | 948.41  |        |                      |                       |                      |                       |                        |                         | 2026.78 | 1013.89<br>(1013.81) | 964.91<br>(964.82)     | 2009.75              | 1005.38               | 2008.77              |
| S             | 1115.41 |        | 1097.40<br>(1115.29) |                       |                      |                       |                        |                         | 1911.75 | 958.38<br>(958.58)   | 907.39<br>(907.26)     | 1894.73              | 947.87                | 1893.74              |
| H             | 1252.47 | 626.74 | 1234.46              | 617.73                | 1235.44<br>(1235.41) | 618.22                | 1154.49                | 577.75                  | 1744.76 | 872.88<br>(872.84)   | 823.89                 | 1727.73              | 864.37                | 1726.75              |
| A             | 1323.50 | 662.28 | 1305.49              | 653.25                | 1306.48              | 653.74                | 1225.53                | 613.27                  | 1607.70 | 804.35               | 1590.67                | 1591.66              | 795.84                | 1589.69              |
| Q(Deamidated) | 1452.55 | 726.78 | 1434.54<br>(1452.31) | 717.77                | 1435.52              | 718.26                | 1354.57<br>(1354.14)   | 677.79                  | 1536.66 | 768.83               | 1519.83<br>(1519.37)   | 1500.80              | 760.32                | 1518.66              |
| P             | 1549.60 | 775.30 | 1531.59              | 766.30                | 1532.57              | 766.79                | 1451.62<br>(1451.39)   | 726.31                  | 1407.62 | 704.31<br>(1407.52)  | 1390.59<br>(1390.50)   | 1389.61              | 695.80                | 1389.61              |
| F             | 1696.67 | 848.84 | 1678.86              | 839.83                | 1679.64              | 840.32                | 1598.69                | 799.85                  | 13      |                      |                        |                      |                       |                      |

Supplemental Table S4. Fragmentation ions for peptide containing S244, S255 and S257.

Cx43-37(1110209) #3484 @617.62 CID  
**S244 CID**

| G | b                  | b <sup>2+</sup>    | [b-H2O]            | [b-H2O] <sup>2+</sup> | [b-NH3] <sup>2+</sup> | [b-H3PO4]            | [b-H3PO4] <sup>2+</sup> | y                  | y <sup>2+</sup>    | [y-NH3] | [y-NH3] <sup>2+</sup> | [y-H2O]            |
|---|--------------------|--------------------|--------------------|-----------------------|-----------------------|----------------------|-------------------------|--------------------|--------------------|---------|-----------------------|--------------------|
| R | 214.12<br>(214.30) | 107.57             |                    |                       | 99.06                 |                      |                         | 1793.82            | 897.41             | 1776.80 | 888.90<br>(888.50)    | 1775.81            |
| S | 381.19<br>(381.42) | 191.07             |                    |                       | 182.55                | 283.15<br>(283.20)   | 142.08                  | 1637.72            | 819.36             | 1620.69 | 810.85                | 1619.71            |
| D | 496.16<br>(496.14) | 248.58             | 478.14             | 239.58                | 240.07                | 398.18<br>(398.25)   | 199.59                  | 1470.72            | 735.86             | 1453.70 | 727.35                | 1452.71            |
| P | 593.21<br>(593.27) | 297.11             | 575.20             | 288.10                | 288.59                | 495.23<br>(495.29)   | 248.12                  | 1355.70            | 678.35<br>(678.41) | 1338.67 | 669.84<br>(669.61)    | 1337.68            |
| Y | 756.27<br>(756.26) | 378.64             | 738.26<br>(738.32) | 369.63                | 370.13                | 658.29<br>(658.28)   | 329.65                  | 1258.64            | 629.83             | 1241.62 | 621.31                | 1240.63            |
| H | 893.33<br>(893.43) | 447.17             | 875.32             | 438.16                | 438.66                | 795.35<br>(795.30)   | 398.18                  | 1095.58            | 548.29             | 1078.55 | 539.78                | 1077.57            |
| A | 966.37<br>(966.39) | 482.69             | 946.36             | 473.68                | 474.17                | 866.39<br>(866.57)   | 433.70                  | 958.52<br>(958.43) | 479.76             | 941.40  | 471.25                | 940.51             |
| T | 1065.41            | 533.21<br>(533.29) | 1047.40            | 524.21<br>(524.19)    | 524.70                | 967.44<br>(967.45)   | 484.22<br>(484.45)      | 887.48<br>(887.46) | 444.25             | 870.46  | 435.73                | 869.47<br>(869.56) |
| T | 1166.46            | 583.74<br>(583.75) | 1148.45            | 574.73<br>(574.87)    | 575.22                | 1068.49<br>(1068.49) | 534.75<br>(534.71)      | 786.44<br>(786.45) | 393.72             | 769.41  | 385.21                | 768.42<br>(768.54) |
| G | 1223.48            | 612.25             | 1205.47            | 603.24                | 603.73                | 1125.51              | 563.26<br>(563.32)      | 685.39<br>(685.37) | 343.20             | 668.36  | 334.68                | 667.38             |
| P | 1320.54            | 660.77<br>(660.97) | 1302.53            | 651.77<br>(651.26)    | 652.26                | 1222.56              | 611.76<br>(611.76)      | 628.37<br>(628.38) | 314.69             | 611.34  | 306.17                | 610.36             |
| L | 1433.62            | 717.31             | 1415.61            | 708.31<br>(708.52)    | 708.80                | 1335.64              | 668.33<br>(668.48)      | 531.31             | 266.16             | 514.29  | 257.85                | 513.30             |
| S | 1520.65            | 760.83<br>(760.63) | 1502.64            | 751.82<br>(751.78)    | 752.32                | 1422.68              | 711.84<br>(718.26)      | 418.23<br>(418.26) | 209.62             | 401.20  | 201.11                | 400.22             |
| P | 1617.71            | 809.36             | 1599.70            | 800.35                | 800.84                | 1519.73              | 760.37                  | 531.20<br>(531.29) | 166.10             | 314.17  | 157.59                | 313.19<br>(313.22) |
| S | 1704.74            | 852.87<br>(852.87) | 1686.73            | 843.87<br>(844.29)    | 844.36<br>(844.29)    | 1606.76              | 803.88<br>(803.81)      | 234.15             | 117.58             | 217.12  | 109.06                | 216.13<br>(216.33) |
| K |                    |                    |                    |                       |                       |                      |                         | 147.11             | 74.06              | 130.09  | 65.55                 |                    |

[M+3H]<sup>3+</sup> 585.10  
 [M+H3PO4+H2O+3H]<sup>3+</sup> 579.22  
 [M+H3PO4+NH3+3H]<sup>3+</sup> 573.06

Yellow: Low&High mass cut off  
 Red: Relative intensity >1.0  
 Theoretical m/z (Observed m/z)

Cx43-37(1110209) #3445-3487 @617.62 ETD  
**S255 ETD**

| G | c                    | c <sup>2+</sup>    | [c+1]                | [c+1] <sup>2+</sup> | [c+2]                | [c+2] <sup>2+</sup> | z                    | z <sup>2+</sup> | [z+1]                | [z+1] <sup>2+</sup> | [z+2]                | [z+2] <sup>2+</sup> |
|---|----------------------|--------------------|----------------------|---------------------|----------------------|---------------------|----------------------|-----------------|----------------------|---------------------|----------------------|---------------------|
| R | 231.16               | 116.08             | 232.16               | 116.58              | 233.16               | 117.09              | 1777.8               | 889.41          | 1778.81              | 889.91              | 1779.81              | 890.41              |
| S | 318.19<br>(318.24)   | 159.06             | 319.2<br>(319.33)    | 160.1               | 320.2                | 160.6               | 1621.7<br>(1621.47)  | 811.35          | 1622.71<br>(1622.64) | 811.86              | 1623.71<br>(1623.63) | 812.36              |
| D | 416.19<br>(416.24)   | 208.60             | 398.18<br>(398.27)   | 199.59              | 399.16               | 199.59              | 1534.67<br>(1534.63) | 767.84          | 1535.68<br>(1535.52) | 768.34              | 1536.68<br>(1536.54) | 768.84              |
| P | 530.27<br>(530.41)   | 265.64             | 531.27               | 266.14              | 532.27               | 266.64              | 1322.59<br>(1322.37) | 661.8           | 1323.6<br>(1323.62)  | 662.3               | 1324.6               | 662.8               |
| Y | 693.33<br>(693.31)   | 347.17             | 694.33<br>(694.49)   | 347.67              | 695.34               | 348.17              | 1159.53<br>(1159.43) | 580.27          | 1160.53<br>(1160.43) | 580.77              | 1161.54              | 581.27              |
| H | 830.39<br>(830.39)   | 415.7              | 831.39<br>(831.45)   | 416.2               | 832.4<br>(832.44)    | 416.7               | 1103.48<br>(1103.36) | 580.27          | 1104.48<br>(1104.36) | 580.77              | 1105.48<br>(1105.36) | 581.27              |
| A | 901.43<br>(901.46)   | 451.22             | 902.43<br>(902.55)   | 451.72              | 903.43<br>(903.54)   | 452.22              | 1022.47<br>(1022.27) | 661.8           | 1023.48<br>(1023.36) | 662.3               | 1024.48<br>(1024.36) | 662.8               |
| T | 1002.48<br>(1002.48) | 501.74             | 1003.48<br>(1003.59) | 502.24              | 1004.48              | 502.74              | 951.43<br>(951.36)   | 661.8           | 952.44<br>(952.38)   | 662.3               | 953.44<br>(953.38)   | 662.8               |
| T | 1103.52<br>(1103.62) | 552.27             | 1104.53<br>(1104.56) | 552.77              | 1105.53              | 553.27              | 850.38<br>(850.25)   | 661.8           | 851.39<br>(851.38)   | 662.3               | 852.39<br>(852.35)   | 662.8               |
| G | 1257.6<br>(1257.63)  | 629.3              | 1258.6<br>(1258.64)  | 629.8               | 1259.6               | 630.31              | 749.33<br>(749.22)   | 661.8           | 750.34<br>(750.36)   | 662.3               | 751.35<br>(751.40)   | 662.8               |
| P | 1370.68<br>(1370.70) | 685.84             | 1371.68<br>(1371.76) | 686.35              | 1372.69<br>(1372.69) | 686.85              | 595.26<br>(595.22)   | 597.27          | 596.27<br>(596.24)   | 597.78              | 595.26<br>(595.22)   | 597.27              |
| S | 1440.69<br>(1440.69) | 720.85<br>(720.89) | 1422.68              | 711.84<br>(711.93)  | 1423.66              | 711.84<br>(711.93)  | 484.19<br>(484.20)   | 661.8           | 483.19<br>(483.28)   | 662.3               | 482.19<br>(482.28)   | 662.8               |
| P | 1537.74<br>(1537.74) | 769.37<br>(769.34) | 1519.73              | 760.37              | 1520.71              | 760.37              | 314.11               | 219.13          | 313.19<br>(313.29)   | 157.10              | 313.19<br>(313.29)   | 157.10              |
| S | 1704.74<br>(1704.74) | 852.87<br>(852.87) | 1686.73              | 843.87<br>(843.87)  | 1687.71              | 843.87              | 147.11               | 74.06           | 130.09               | 65.55               | 131.11               | 66.55               |
| K |                      |                    |                      |                     |                      |                     |                      |                 |                      |                     |                      |                     |

[M+3H]<sup>3+</sup> 617.95

Yellow: Low&High mass cut off  
 Red: Relative intensity >0.2  
 Theoretical m/z (Observed m/z)

Cx43-37(1110209) #3508 @617.62 ETD  
**S244 ETD**

| G | c                    | c <sup>2+</sup>   | [c+1]                | [c+1] <sup>2+</sup> | [c+2]              | [c+2] <sup>2+</sup> | z                    | z <sup>2+</sup>    | [z+1]                | [z+1] <sup>2+</sup> | [z+2]                | [z+2] <sup>2+</sup> |
|---|----------------------|-------------------|----------------------|---------------------|--------------------|---------------------|----------------------|--------------------|----------------------|---------------------|----------------------|---------------------|
| R | 231.16<br>(231.23)   | 116.08            | 232.16               | 116.58              | 233.16             | 117.09              | 1777.8               | 889.41<br>(889.47) | 1778.81<br>(1778.65) | 889.91<br>(889.97)  | 1779.81<br>(1779.80) | 890.41<br>(890.12)  |
| S | 398.15<br>(398.07)   | 199.58            | 399.16               | 200.08              | 400.00             | 200.58              | 1621.7<br>(1622.53)  | 811.35             | 1622.71<br>(1622.53) | 811.86              | 1623.71<br>(1623.53) | 812.36              |
| D | 416.19<br>(416.24)   | 208.60            | 398.18<br>(398.27)   | 199.59              | 399.16             | 199.59              | 1534.67<br>(1534.64) | 767.84             | 1535.68<br>(1535.64) | 768.34              | 1536.68<br>(1536.64) | 768.84              |
| P | 530.27<br>(530.38)   | 265.62            | 531.27               | 266.12              | 532.27             | 266.62              | 1322.59<br>(1322.51) | 661.8              | 1323.6<br>(1323.52)  | 662.3               | 1324.6               | 662.8               |
| Y | 693.33<br>(693.43)   | 347.15            | 694.33<br>(694.43)   | 347.65              | 695.34             | 348.15              | 1159.53<br>(1159.43) | 580.27             | 1160.53<br>(1160.43) | 580.77              | 1161.54              | 581.27              |
| H | 830.39<br>(830.49)   | 415.7             | 831.39<br>(831.49)   | 416.2               | 832.4<br>(832.5)   | 416.7               | 1103.48<br>(1103.58) | 580.27             | 1104.48<br>(1104.58) | 580.77              | 1105.48<br>(1105.58) | 581.27              |
| A | 901.43<br>(901.53)   | 451.2             | 902.43<br>(902.53)   | 451.7               | 903.43<br>(903.53) | 452.2               | 1022.47<br>(1022.57) | 661.8              | 1023.48<br>(1023.58) | 662.3               | 1024.48<br>(1024.58) | 662.8               |
| T | 1002.48<br>(1002.58) | 501.7             | 1003.48<br>(1003.58) | 502.2               | 1004.48            | 502.7               | 951.43<br>(951.53)   | 661.8              | 952.44<br>(952.54)   | 662.3               | 953.44<br>(953.54)   | 662.8               |
| T | 1103.52<br>(1103.62) | 552.2             | 1104.53<br>(1104.63) | 552.7               | 1105.53            | 553.2               | 850.38<br>(850.48)   | 661.8              | 851.39<br>(851.49)   | 662.3               | 852.39<br>(852.49)   | 662.8               |
| G | 1257.6<br>(1257.7)   | 629.3             | 1258.6<br>(1258.7)   | 629.8               | 1259.6             | 630.3               | 749.33<br>(749.4)    | 661.8              | 750.34<br>(750.4)    | 662.3               | 751.35<br>(751.4)    | 662.8               |
| P | 1370.68<br>(1370.7)  | 685.8             | 1371.68<br>(1371.7)  | 686.3               | 1372.69            | 686.8               | 595.26<br>(595.3)    | 597.27             | 596.27<br>(596.3)    | 597.78              | 595.26<br>(595.3)    | 597.27              |
| S | 1440.69<br>(1440.7)  | 720.85<br>(720.9) | 1422.68              | 711.84<br>(711.9)   | 1423.66            | 711.84<br>(711.9)   | 484.19<br>(484.2)    | 661.8              | 483.19<br>(483.2)    | 662.3               | 482.19<br>(483.2)    | 662.8               |
| P | 1537.74<br>(1537.7)  | 769.37<br>(769.4) | 1519.73              | 760.37              | 1520.71            | 760.37              | 314.11               | 219.13             | 313.19<br>(313.2)    | 157.10              | 313.19<br>(313.2)    | 157.10              |
| S | 1704.74<br>(1704.7)  | 852.87<br>(852.9) | 1686.73              | 843.87<br>(843.9)   | 1687.71            | 843.87              | 147.11               | 74.06              | 130.09               | 65.55               | 131.11               | 66.55               |
| K |                      |                   |                      |                     |                    |                     |                      |                    |                      |                     |                      |                     |

[M+3H]<sup>3+</sup> 617.94

Yellow: Low&High mass cut off  
 Red: Relative intensity >1.0  
 Theoretical m/z (Observed m/z)

Cx43-37(1110209) #3442 @617.62 CID  
**S257 CID**

| G | b                    | b <sup>2+</sup>    | [b-H2O]              | [b-H2O] <sup>2+</sup> | [b-NH3]            | [b-H3PO4] <sup>2+</sup> | y                    | y <sup>2+</sup>    | [y-H3PO4]            | [y-H3PO4] <sup>2+</sup> | [y-H2O]              |
|---|----------------------|--------------------|----------------------|-----------------------|--------------------|-------------------------|----------------------|--------------------|----------------------|-------------------------|----------------------|
| R | 214.13               | 107.57             |                      |                       | 197.10             |                         | 1793.82              | 897.41             | 1695.84              | 848.43                  | 1775.81              |
| S | 301.16<br>(301.39)   | 151.08             | 283.15               | 142.08                | 284.14             |                         | 1637.72              | 819.36             | 1539.74              | 770.38<br>(770.42)      | 1619.71              |
| D | 416.19<br>(416.24)   | 208.60             | 398.18<br>(398.27)   | 199.59                | 399.16             |                         | 1550.69              | 775.85             | 1452.71              | 726.86                  | 1532.68              |
| P | 513.24               | 257.12             | 495.23               | 248.11                | 496.22             |                         | 1435.66              | 718.33<br>(718.34) | 1337.68              | 669.35<br>(669.40)      | 1417.65              |
| Y | 676.30<br>(676.30)   | 338.66             | 658.29               | 329.65                | 659.28             |                         | 1338.61              | 669.81             | 1240.63              | 620.82                  | 1320.60              |
| H | 813.36<br>(813.35)   | 407.19             | 795.35<br>(795.44)   | 398.18                | 796.34             |                         | 1175.55              | 688.28<br>(688.48) | 1077.57<br>(1077.56) | 539.29<br>(539.52)      | 1157.54              |
| A | 884.4<br>(884.51)    | 442.70             | 866.39<br>(866.43)   | 433.70                | 867.37<br>(867.66) |                         | 1038.49<br>(1038.45) | 519.75             | 940.51<br>(940.43)   | 470.76<br>(470.84)      | 1020.48<br>(1020.86) |
| T | 985.45<br>(985.49)   | 493.27             | 967.44<br>(967.43)   | 484.22<br>(484.23)    | 968.37<br>(968.36) |                         | 867.45               | 484.22<br>(484.23) | 869.47<br>(869.40)   | 435.24                  | 869.44               |
| T | 1086.49<br>(1086.51) | 543.75             | 1068.49<br>(1068.49) | 534.75                | 1069.47            |                         | 866.40               | 433.70<br>(433.70) | 768.43<br>(768.41)   | 334.19                  | 848.39               |
| G | 1143.52              | 572.26<br>(572.98) | 1125.51              | 563.26<br>(563.49)    | 1126.49            |                         | 765.35<br>(765.34)   | 383.18             | 667.38               | 334.19                  | 747.34<br>(747.29)   |
| P | 1240.57              | 620.79<br>(620.58) | 1222.56              | 611.78                | 1223.54            |                         | 708.33               | 354.67             | 610.36               | 305.68                  | 690.32               |
| L | 1353.65              | 677.33<br>(677.44) | 1335.64              | 668.33<br>(668.43)    | 1336.63            |                         | 611.28               | 306.14             | 513.30               | 257.16                  | 593.27               |
| S | 1440.69<br>(1440.69) | 720.85<br>(720.89) | 1422.68              | 711.84<br>(711.93)    | 1423.66            |                         | 498.2<br>(498.1)     | 249.60             | 403.22<br>(403.2)    | 200.61                  | 480.19               |
| P | 1537.74<br>(1537.7)  | 769.37<br>(769.3   |                      |                       |                    |                         |                      |                    |                      |                         |                      |

Supplemental Table S5. Fragmentation ions for peptide containing S314.

Cx43-36 #3004 @659.26 CID

**S314 CID**      b      [b-H2O]      [b-NH3]      y      y 2+      [y-H3PO4]      [y-H3PO4]2+      [y-NH3]      [y-NH3]2+  
in figure as:      **b**      **b\***      **b-**      **y**      **y<sup>2+</sup>**      **y**      **y<sup>2+</sup>**      **y-**

| Q        |                      |                      |                      |                      |                    |                    |                    |                      |                    |
|----------|----------------------|----------------------|----------------------|----------------------|--------------------|--------------------|--------------------|----------------------|--------------------|
| A        | 200.10               |                      | 183.08               | 1847.73              | 924.37             | 1749.76            | 875.38             | 1830.71              | 915.86             |
| S        | 287.14               | 269.12               | 270.11               | 1776.70              | 888.85<br>(888.91) | 1678.72            | 839.86             | 1759.67              | 880.34             |
| E        | 416.18               | 398.17               | 399.15               | 1689.67              | 845.34<br>(845.35) | 1591.69            | 796.35             | 1672.64              | 836.82             |
| Q        | 544.24<br>(544.19)   | 526.23               | 527.21<br>(527.08)   | 1560.62              | 780.82             | 1462.65            | 731.83             | 1543.60              | 772.30             |
| N        | 658.28<br>(658.07)   | 640.27               | 641.25               | 1432.56              | 716.79<br>(716.85) | 1334.59            | 667.80<br>(667.98) | 1415.54              | 708.27<br>(708.42) |
| W        | 844.36<br>(844.27)   | 826.35<br>(826.18)   | 827.33<br>(827.30)   | 1318.52              | 659.76             | 1220.54            | 610.78<br>(610.79) | 1301.49              | 651.25             |
| A        | 915.40<br>(915.32)   | 897.39<br>(897.55)   | 898.37<br>(898.29)   | 1132.44<br>(1132.22) | 566.72<br>(566.79) | 1034.47            | 517.74<br>(517.80) | 1115.42<br>(1115.26) | 558.21             |
| N        | 1029.45<br>(1029.24) | 1011.43              | 1012.41<br>(1012.12) | 1061.40<br>(1061.20) | 531.21<br>(531.18) | 963.43<br>(963.49) | 482.22<br>(482.30) | 1044.38<br>(1044.32) | 522.69             |
| Y        | 1192.50<br>(1192.60) | 1174.49<br>(1174.28) | 1175.48              | 947.36<br>(947.26)   | 474.18<br>(474.17) | 849.39             | 425.20<br>(425.72) | 930.34<br>(930.12)   | 465.67<br>(465.53) |
| <u>S</u> | 1359.50              | 1341.49              | 1342.47              | 784.30<br>(784.20)   | 392.65             | 686.32<br>(686.45) | 343.66             | 767.27               | 384.14             |
| A        | 1430.54              | 1412.53              | 1413.51              | 617.30<br>(617.28)   | 309.15             |                    |                    | 600.27<br>(600.48)   | 300.64             |
| E        | 1559.58              | 1541.57              | 1542.55              | 546.26<br>(546.29)   | 273.64             |                    |                    | 529.24<br>(529.29)   | 265.12             |
| Q        | 1687.64              | 1669.63              | 1670.61              | 417.22<br>(417.17)   | 209.11             |                    |                    | 400.19               | 200.60             |
| N        | 1801.68              | 1783.67              | 1784.65              | 289.16<br>(289.20)   | 145.08             |                    |                    | 272.14               | 136.57             |
| R        |                      |                      |                      | 175.12               | 88.06              |                    |                    | 158.09               | 79.55              |

|                      |        |
|----------------------|--------|
| [M-H3PO4+3H]3+       | 626.66 |
| [M-H3PO4-NH3+3H]3+   | 620.9  |
| [M-H3PO4-NH3-H2O+3H] | 615.18 |

|                                |                         |
|--------------------------------|-------------------------|
| <b>Yellow:</b>                 | Low&High mass cut off   |
| <b>Red:</b>                    | Relative intensity >2.0 |
| Theoretical m/z (Observed m/z) |                         |

Cx43-36 (11102009) #3787 @659.27 ETD

**MASCOT score: 85**

**S314 ETD**      c      [c+1]      z      [z+1]  
in figure as:      **c**      **c+1**      **z**      **z+1**

| Q        |                      |                      |                      |                      |
|----------|----------------------|----------------------|----------------------|----------------------|
| A        | 217.13<br>(217.22)   | 218.13               | 1831.72              | 1832.72<br>(1832.45) |
| S        | 304.16               | 305.16               | 1760.69<br>(1760.44) | 1761.69<br>(1761.49) |
| E        | 433.2<br>(433.45)    | 434.21<br>(434.28)   | 1673.64<br>(1673.48) | 1674.65<br>(1674.59) |
| Q        | 561.26<br>(561.49)   | 562.27<br>(562.15)   | 1544.6<br>(1544.52)  | 1545.61<br>(1545.52) |
| N        | 675.31<br>(675.31)   | 676.31<br>(676.60)   | 1416.55<br>(1416.34) | 1417.55<br>(1417.47) |
| W        | 861.39<br>(861.50)   | 862.39<br>(862.36)   | 1302.5<br>(1302.33)  | 1303.51              |
| A        | 932.42<br>(932.52)   | 933.43<br>(933.43)   | 1116.42<br>(1116.25) | 1117.43<br>(1117.31) |
| N        | 1046.47<br>(1046.56) | 1047.47<br>(1047.47) | 1045.39<br>(1045.05) | 1046.39              |
| Y        | 1209.53<br>(1209.36) | 1210.53<br>(1210.26) | 931.34<br>(931.63)   | 932.35               |
| <u>S</u> | 1376.53<br>(1376.40) | 1377.53<br>(1377.56) | 768.28               | 769.29               |
| A        | 1447.56              | 1448.57<br>(1448.51) | 601.28<br>(601.45)   | 602.29               |
| E        | 1576.61<br>(1576.56) | 1577.61<br>(1577.51) | 530.24<br>(530.55)   | 531.25               |
| Q        | 1704.67<br>(1704.66) | 1705.67<br>(1705.67) | 401.2                | 402.21               |
| N        | 1818.71<br>(1818.74) | 1819.71<br>(1819.63) | 273.14               | 274.15               |
| R        |                      |                      | 159.1                | 160.11               |

|          |        |
|----------|--------|
| [M+3H]3+ | 659.42 |
|----------|--------|

|                                |                         |
|--------------------------------|-------------------------|
| <b>Yellow:</b>                 | Low&High mass cut off   |
| <b>Red:</b>                    | Relative intensity >1.0 |
| Theoretical m/z (Observed m/z) |                         |

Supplemental Table S6. Fragmentation ions for peptides containing S296 and S297.

Cx43-29(CAMKII) #521 @668.76 CID

| <b>S296 CID</b>     | b                    | [b-H3PO4]            | y                    | y 2+               | [y-H3PO4]            | [y-H3PO4]2+        | [y-H2O]            | y-H2O-H3PO4]       |
|---------------------|----------------------|----------------------|----------------------|--------------------|----------------------|--------------------|--------------------|--------------------|
| N                   |                      |                      |                      |                    |                      |                    |                    |                    |
| N                   | 229.09<br>(229.00)   |                      | 1222.47              | 611.74             | 1124.49              | 562.75<br>(562.64) | 1204.46            | 1106.48            |
| <b>S</b>            | 396.09               | 298.11<br>(298.18)   | 1108.42<br>(1108.36) | 554.72<br>(554.64) | 1010.45<br>(1010.45) | 505.73<br>(505.82) | 1090.41            | 992.44<br>(992.45) |
| S                   | 483.12               | 385.15<br>(385.00)   | 941.43<br>(941.00)   | 471.22<br>(471.18) |                      |                    | 923.42<br>(923.45) |                    |
| C (Carbamidomethyl) | 643.15               | 545.18<br>(545.27)   | 854.39<br>(854.27)   | 427.70<br>(427.91) |                      |                    |                    |                    |
| R                   | 799.26<br>(799.18)   | 701.28<br>(701.18)   | 694.36<br>(694.36)   | 347.69             |                      |                    |                    |                    |
| N                   | 913.30<br>(913.36)   | 815.32               | 538.26<br>(538.45)   | 269.63<br>(269.82) |                      |                    |                    |                    |
| Y                   | 1076.36<br>(1076.18) | 978.38<br>(978.18)   | 424.22<br>(424.18)   | 212.61<br>(212.00) |                      |                    |                    |                    |
| N                   | 1190.40              | 1092.43<br>(1092.27) | 261.16<br>(261.18)   | 131.08             |                      |                    |                    |                    |
| K                   |                      |                      | 147.11               | 74.06              |                      |                    |                    |                    |

|                        |        |
|------------------------|--------|
| [M-H3PO4+2H]2+         | 619.82 |
| [M-H3PO4-NH3+2H]2+     | 611.27 |
| [M-H3PO4-NH3-H2O+2H]2+ | 602.27 |

|                                |                         |
|--------------------------------|-------------------------|
| Yellow:                        | Low&High mass cut off   |
| Red:                           | Relative intensity >0.5 |
| Theoretical m/z (Observed m/z) |                         |

Cx43-29(CAMKII) #863 @659.96 CID

| <b>S297 CID</b>     | b                  | b 2+               | [b-H3PO4]           | y                  | y 2+               | [y-H3PO4]2+        | [y-H2O-H3PO4]2+    |
|---------------------|--------------------|--------------------|---------------------|--------------------|--------------------|--------------------|--------------------|
| L                   |                    |                    |                     |                    |                    |                    |                    |
| V                   | 213.16<br>(213.09) |                    |                     | 1864.78            | 932.89             | 883.90<br>(883.27) | 874.90<br>(874.82) |
| T                   | 314.21<br>(314.27) |                    |                     | 1765.71            | 883.36             | 834.37<br>(834.82) | 825.36<br>(825.82) |
| G                   | 371.23             |                    |                     | 1664.66            | 832.83             | 783.84<br>(783.91) | 774.84             |
| D                   | 486.26<br>(486.27) |                    |                     | 1607.64            | 804.32             | 755.33<br>(746.64) | 746.33<br>(746.64) |
| R                   | 642.36             | 321.68             |                     | 1492.61            | 746.81             | 697.82<br>(697.82) | 688.82<br>(688.82) |
| N                   | 756.40             | 378.70             |                     | 1336.51            | 668.76             | 619.77             | 610.76             |
| N                   | 870.45             | 435.73             |                     | 1222.47            | 611.74             | 562.75             | 553.74             |
| S                   | 957.47             | 479.24<br>(479.27) |                     | 1108.42            | 554.72             | 505.73<br>(505.82) | 496.72             |
| <b>S</b>            | 1124.47            | 562.74             | 1026.5<br>(1026.55) | 1021.39            | 511.20             | 462.21<br>(462.27) |                    |
| C (Carbamidomethyl) | 1284.50            | 642.76             | 1186.53             | 854.39             | 427.70<br>(427.73) |                    |                    |
| R                   | 1440.61            | 720.81             | 1342.63             | 694.36             | 347.69             |                    |                    |
| N                   | 1554.65            | 777.83             | 1456.67             | 538.26<br>(538.36) | 269.63             |                    |                    |
| Y                   | 1717.71            | 859.36             | 1619.73             | 424.22<br>(424.18) | 212.61             |                    |                    |
| N                   | 1831.75            | 916.38             | 1733.78             | 261.16             | 131.08             |                    |                    |
| K                   |                    |                    |                     | 147.11             | 74.06              |                    |                    |

|                        |        |
|------------------------|--------|
| [M-H3PO4+3H]3+         | 627.45 |
| [M-H3PO4-NH3+3H]3+     | 621.55 |
| [M-H3PO4-NH3-H2O+3H]3+ | 615.64 |

|                                |                         |
|--------------------------------|-------------------------|
| Yellow:                        | Low&High mass cut off   |
| Red:                           | Relative intensity >0.2 |
| Theoretical m/z (Observed m/z) |                         |

Cx43-37(11102009) #2444 @487.21 ETD

MASCOT score: 61

| <b>S296 ETD</b>     | c                    | [c+1]                | z                    | [z+1]                |
|---------------------|----------------------|----------------------|----------------------|----------------------|
| L                   |                      |                      |                      |                      |
| V                   | 230.19               | 231.19               | 1329.51              | 1330.52<br>(1330.51) |
| T                   | 331.23<br>(331.33)   | 332.24<br>(332.26)   | 1230.44<br>(1230.03) | 1231.45<br>(1231.41) |
| G                   | 388.26<br>(388.10)   | 389.26<br>(389.30)   | 1129.40<br>(1129.02) | 1130.40<br>(1130.31) |
| D                   | 503.28<br>(503.27)   | 504.29<br>(504.21)   | 1072.38<br>(1072.24) | 1073.38<br>(1073.37) |
| R                   | 659.38<br>(659.45)   | 660.39<br>(660.56)   | 957.35<br>(957.23)   | 958.36<br>(958.22)   |
| N                   | 773.43<br>(773.34)   | 774.43<br>(774.48)   | 801.25<br>(801.27)   | 802.25<br>(802.14)   |
| N                   | 887.47<br>(887.49)   | 888.47<br>(888.56)   | 687.20<br>(687.09)   | 688.21<br>(688.16)   |
| <b>S</b>            | 1054.47<br>(1054.53) | 1055.47<br>(1055.50) | 573.16<br>(572.98)   | 574.17<br>(574.10)   |
| S                   | 1141.50<br>(1141.22) | 1142.50<br>(1142.41) | 406.16<br>(406.08)   | 407.17<br>(407.28)   |
| C (Carbamidomethyl) | 1301.53<br>(1301.45) | 1302.53<br>(1302.53) | 319.13<br>(319.64)   | 320.14               |
| R                   |                      |                      | 159.10               | 160.11               |

|          |        |
|----------|--------|
| [M+3H]3+ | 487.19 |
|----------|--------|

|                                |                         |
|--------------------------------|-------------------------|
| Yellow:                        | Low&High mass cut off   |
| Red:                           | Relative intensity >0.5 |
| Theoretical m/z (Observed m/z) |                         |

Cx43-37(11102009) #2502 @730.81 ETD

MASCOT score: 30

| <b>S297 ETD</b>     | c                    | [c+1]                | z                    | [z+1]                |
|---------------------|----------------------|----------------------|----------------------|----------------------|
| L                   |                      |                      |                      |                      |
| V                   | 230.19               | 231.19               | 1330.50<br>(1330.98) | 1331.50<br>(1331.71) |
| T                   | 331.23               | 332.24               | 1231.43<br>(1231.46) | 1232.44<br>(1232.63) |
| G                   | 388.26               | 389.26               | 1130.38<br>(1130.49) | 1131.39<br>(1131.55) |
| D                   | 503.28               | 504.29               | 1073.36<br>(1073.10) | 1074.37<br>(1074.25) |
| R                   | 659.38<br>(659.37)   | 660.39<br>(660.20)   | 958.33<br>(958.41)   | 959.34<br>(959.36)   |
| N                   | 773.43<br>(773.52)   | 774.43               | 802.23               | 803.24               |
| N (Deamidated)      | 888.45<br>(888.51)   | 889.46               | 688.19               | 689.20               |
| S                   | 975.49<br>(975.35)   | 976.49<br>(976.36)   | 573.16               | 574.17               |
| <b>S</b>            | 1142.48              | 1143.49              | 486.13               | 487.14               |
| C (Carbamidomethyl) | 1302.51<br>(1302.56) | 1303.52<br>(1303.51) | 319.13               | 320.14               |
| R                   |                      |                      | 159.10               | 160.11               |

|          |        |
|----------|--------|
| [M+2H]2+ | 730.63 |
|----------|--------|

|                                |                         |
|--------------------------------|-------------------------|
| Yellow:                        | Low&High mass cut off   |
| Red:                           | Relative intensity >0.5 |
| Theoretical m/z (Observed m/z) |                         |

Supplemental Table S7. Fragmentation ions for peptide containing S364 and S365.

Cx43-35 #3763 @742.04 CID

| S364 CID | b                    | b 2+                 | [b-H2O]            | [b-NH3]            | [b-NH3]2+          | [b-H3PO4]2+        | y                  | [y-H3PO4]          | [y-H3PO4]2+        |
|----------|----------------------|----------------------|--------------------|--------------------|--------------------|--------------------|--------------------|--------------------|--------------------|
| V        |                      |                      |                    |                    |                    |                    | 2125.06            | 2027.08            | 1014.04            |
| A        | 171.11               |                      |                    |                    |                    |                    | 2054.02            | 1956.04            | 978.52<br>(978.75) |
| G        | 299.17               |                      |                    |                    |                    |                    | 1982.98            | 1885.00            | 943.01             |
| H        | 436.23<br>(436.08)   | 218.62               |                    |                    |                    |                    | 1925.96            | 1827.98            | 914.49<br>(914.33) |
| E        | 565.27<br>(565.42)   | 283.14               | 547.26<br>(547.25) |                    |                    |                    | 1788.90            | 1690.92            | 845.97             |
| L        | 678.36<br>(678.42)   | 339.68<br>(339.75)   | 660.35             |                    |                    |                    | 1659.86            | 1561.88            | 781.44<br>(781.33) |
| Q        | 807.40<br>(807.33)   | 404.20               | 789.39             | 790.37             | 395.69             |                    | 1546.77            | 1448.80            | 724.90<br>(724.75) |
| P        | 904.45               | 452.73               | 886.44<br>(886.33) | 887.43<br>(887.08) | 444.22             |                    | 1417.73            | 1319.75            | 660.38             |
| L        | 1017.54<br>(1017.67) | 509.27               | 999.53             | 1000.51            | 500.76             |                    | 1320.68            | 1222.70            | 611.85             |
| A        | 1088.57              | 544.79<br>(544.75)   | 1070.56            | 1071.55            | 536.28<br>(536.83) |                    | 1207.59            | 1109.62            | 555.31             |
| I        | 1201.66<br>(1201.50) | 601.33               | 1183.65            | 1184.63            | 592.82             |                    | 1136.56            | 1038.58            | 519.79<br>(519.50) |
| V        | 1300.73<br>(1300.25) | 650.87               | 1282.72            | 1283.70            | 642.35<br>(642.50) |                    | 1023.47            | 925.50<br>(925.00) | 463.25<br>(463.92) |
| D        | 1414.77<br>(1414.50) | 707.89               | 1396.76            | 1397.74            | 699.37<br>(699.33) |                    | 924.40             | 826.43             | 413.72             |
| Q        | 1542.83              | 771.92               | 1524.82            | 1525.80            | 763.40             |                    | 810.36             | 712.38<br>(712.08) | 356.70<br>(356.75) |
| R        | 1698.93              | 849.97               | 1680.92            | 1681.90            | 841.45             |                    | 682.30<br>(682.42) | 584.33             | 292.67             |
| P        | 1795.98              | 898.49               | 1777.97            | 1778.95            | 889.98             |                    | 526.20<br>(526.08) | 428.23<br>(428.33) | 214.62             |
| S        | 1962.98              | 981.99               | 1944.97            | 1945.95            | 973.48             | 933.01<br>(933.08) | 429.15             | 331.17             | 166.09             |
| S        | 2050.01              | 1025.51<br>(1025.25) | 2032.00            | 2032.99            | 1017.00            | 976.52<br>(976.58) | 262.15<br>(262.08) |                    |                    |
| R        |                      |                      |                    |                    |                    |                    | 175.12             |                    |                    |

|                       |        |
|-----------------------|--------|
| [M-H3PO4+3H]3+        | 709.33 |
| [M-H3PO4-H2O+3H]3+    | 703.58 |
| [M-H3PO4-NH3-H2O+3H]3 | 697.67 |

|                                |                         |
|--------------------------------|-------------------------|
| Yellow:                        | Low&High mass cut off   |
| Red:                           | Relative intensity >0.4 |
| Theoretical m/z (Observed m/z) |                         |

Cx43-35 #3757 @742.04 CID

| S365 CID | b                    | b 2+                 | [b-H2O]2+          | [b-NH3]2+          | y                    | y 2+               | [y-H3PO4]2+        |                    |
|----------|----------------------|----------------------|--------------------|--------------------|----------------------|--------------------|--------------------|--------------------|
| V        |                      |                      |                    |                    |                      | 2125.06            | 1063.03            | 1014.04            |
| A        | 171.11               |                      |                    |                    |                      | 2054.02            | 1027.51            | 978.52             |
| G        | 299.17               |                      |                    |                    |                      | 1982.98            | 991.99<br>(991.83) | 943.01<br>(943.00) |
| H        | 436.23<br>(436.08)   | 218.62               |                    |                    |                      | 1925.96            | 963.48<br>(963.58) | 914.49<br>(914.50) |
| E        | 565.27<br>(565.33)   | 283.14               | 274.13             |                    |                      | 1788.90            | 894.95<br>(894.92) | 845.97<br>(845.92) |
| L        | 678.36<br>(678.00)   | 339.68               | 330.68             |                    |                      | 1659.86            | 830.43<br>(830.17) | 781.44<br>(781.42) |
| Q        | 806.42<br>(806.17)   | 403.71               | 394.71             | 395.20             | 1546.77              |                    | 773.89<br>(774.08) | 724.90             |
| P        | 903.47               | 452.24               | 443.23             | 443.72             | 1418.72              |                    | 709.86             | 660.87             |
| L        | 1016.55              | 508.78               | 499.77             | 500.27             | 1321.66              |                    | 661.33<br>(661.33) | 612.35             |
| A        | 1087.59<br>(1087.33) | 544.30<br>(544.25)   | 535.29             | 535.79             | 1208.58              |                    | 604.79             | 555.80             |
| I        | 1200.67<br>(1200.42) | 600.84<br>(600.92)   | 591.84             | 592.33<br>(592.42) | 1137.54<br>(1137.33) | 569.27<br>(569.08) | 520.29<br>(520.17) | 463.74             |
| V        | 1299.74<br>(1299.58) | 650.37<br>(650.58)   | 641.37             | 641.86             | 1024.46<br>(1024.58) | 512.73<br>(512.67) | 463.20             | 414.21             |
| D        | 1414.77<br>(1414.67) | 707.89               | 698.88<br>(698.67) | 699.37<br>(699.50) | 925.39<br>(925.17)   | 463.20<br>(463.42) | 414.21             |                    |
| Q        | 1542.83              | 771.92               | 762.91             | 763.40             | 810.36<br>(810.58)   | 405.68<br>(405.75) | 356.70<br>(356.67) |                    |
| R        | 1698.93              | 849.97<br>(849.83)   | 840.96             | 841.45<br>(841.33) | 682.30               | 341.66<br>(341.67) | 292.67             |                    |
| P        | 1795.98              | 898.49<br>(898.42)   | 889.49             | 889.98             | 526.20<br>(526.33)   | 263.60             | 214.62             |                    |
| S        | 1883.01              | 942.01               | 933.01             | 933.50             | 429.15<br>(429.25)   | 215.08             | 166.09             |                    |
| S        | 2050.01              | 1025.51<br>(1025.42) | 1016.50            | 1017.00            | 342.12               | 171.56             | 122.57             |                    |
| R        |                      |                      |                    |                    | 175.12               | 88.06              |                    |                    |

|                       |        |
|-----------------------|--------|
| [M-H3PO4+3H]3+        | 709.42 |
| [M-H3PO4-H2O+3H]3+    | 703.75 |
| [M-H3PO4-NH3-H2O+3H]3 | 697.67 |

|                                |                         |
|--------------------------------|-------------------------|
| Yellow:                        | Low&High mass cut off   |
| Red:                           | Relative intensity >0.3 |
| Theoretical m/z (Observed m/z) |                         |

Cx43-36(11102009) #4619 @742.38 ETD

MASCOT score: 35

| S364 ETD | c                    | [c+1]                | z                    | [z+1]                |
|----------|----------------------|----------------------|----------------------|----------------------|
| V        |                      |                      |                      |                      |
| A        | 188.14               | 189.14               | 2109.04              | 2110.04              |
| A        | 259.18               | 260.18               | 2038.00              | 2039.01              |
| G        | 316.20<br>(316.29)   | 317.20               | 1966.96<br>(1966.80) | 1967.97<br>(1967.90) |
| H        | 453.26<br>(453.28)   | 454.26<br>(454.35)   | 1909.94<br>(1910.09) | 1910.95<br>(1910.82) |
| E        | 582.30<br>(582.44)   | 583.30<br>(583.42)   | 1772.88<br>(1772.57) | 1773.89<br>(1773.72) |
| L        | 696.38<br>(696.43)   | 696.39<br>(696.30)   | 1643.84<br>(1643.66) | 1644.85<br>(1644.64) |
| Q        |                      |                      | 1530.76<br>(1530.53) | 1531.76<br>(1531.67) |
| P        | 920.49<br>(920.48)   | 921.50<br>(921.70)   |                      |                      |
| L        | 1033.58<br>(1033.51) | 1034.58<br>(1034.49) | 1305.64<br>(1305.39) | 1306.65<br>(1306.36) |
| A        | 1104.62<br>(1104.83) | 1105.62<br>(1105.67) | 1192.56<br>(1192.25) | 1193.57<br>(1193.53) |
| I        | 1217.70<br>(1217.75) | 1218.70<br>(1218.66) | 1121.52              | 1122.53<br>(1122.53) |
| V        | 1316.77<br>(1316.60) | 1317.77<br>(1317.26) | 1008.44<br>(1008.40) | 1009.45<br>(1009.52) |
| D        | 1431.80<br>(1431.71) | 1432.80<br>(1432.71) | 909.37               | 910.38<br>(910.24)   |
| Q        | 1559.85<br>(1559.88) | 1560.86<br>(1560.62) | 794.34<br>(794.34)   | 795.35<br>(795.38)   |
| R        |                      |                      | 666.28<br>(666.18)   | 667.29<br>(667.37)   |
| P        | 1813.01              | 1814.01<br>(1814.22) |                      |                      |
| S        | 1980.01<br>(1980.14) | 1981.01<br>(1980.95) | 413.13               | 414.14<br>(414.28)   |
| S        | 2067.04              | 2068.04              | 246.13               | 247.14<br>(247.26)   |
| R        |                      |                      | 159.10               | 160.11               |

|          |        |
|----------|--------|
| [M+3H]3+ | 742.48 |
|----------|--------|

|                                |                         |
|--------------------------------|-------------------------|
| Yellow:                        | Low&High mass cut off   |
| Red:                           | Relative intensity >0.4 |
| Theoretical m/z (Observed m/z) |                         |

Supplemental Table S8. Fragmentation ions for peptides containing S369, S372 and S373.

Cx43-35 #3294 @718.33 CID

| S372 CID | b                    | b2+                | [b-H2O]2+          | [b-NH3]            | [b-NH3]2+          | [b-H3PO4]          | [b-H3PO4]2+        | y                  | y2+                | [y-H3PO4]2+     | [y-NH3]2+          | [y-H2O]            | [y-H2O]2+          |
|----------|----------------------|--------------------|--------------------|--------------------|--------------------|--------------------|--------------------|--------------------|--------------------|-----------------|--------------------|--------------------|--------------------|
| A        |                      |                    |                    |                    |                    |                    |                    |                    |                    |                 |                    |                    |                    |
| S        | 239.04<br>(326.07)   |                    |                    |                    |                    | 141.07             |                    | 1364.62            | 682.81<br>(682.83) | 633.83 (634.00) | 674.30             | 1346.61            | 673.81<br>(673.67) |
| R        | 326.07<br>(482.25)   |                    |                    |                    |                    | 228.10             |                    | 1197.62            | 599.31<br>(599.25) |                 | 590.80<br>(590.67) | 1179.61            | 590.31<br>(590.25) |
| S        | 482.18<br>(482.25)   | 241.59             | 232.59             | 465.15             | 233.08             | 384.20<br>(384.08) | 192.60             | 1110.59            | 555.80<br>(555.83) |                 | 547.29             | 1092.58            | 546.79             |
| P        | 579.23<br>(579.17)   | 290.12             | 281.11             | 562.20             | 281.60             | 481.25             | 241.13             | 954.49<br>(954.42) | 477.75             |                 | 469.23             | 936.48<br>(936.67) | 468.74             |
| R        | 735.33<br>(735.33)   | 368.17             | 359.16             | 718.30             | 359.66             | 637.35             | 319.18             | 857.44             | 429.22             |                 | 420.71             | 839.43             | 420.22             |
| P        | 832.38               | 416.69             | 407.69             | 815.36             | 408.18             | 734.41             | 367.71             | 701.34<br>(701.67) |                    |                 |                    | 683.32<br>(683.25) |                    |
| D        | 947.41<br>(947.42)   | 474.21<br>(474.33) | 465.20             | 930.38<br>(930.75) | 465.70             | 849.43<br>(849.75) | 425.22<br>(425.50) | 604.28<br>(604.42) |                    |                 |                    | 586.27             |                    |
| D        | 1062.44<br>(1062.58) | 531.72<br>(531.83) | 522.72             | 1045.41            | 523.21             | 964.46             | 482.73<br>(482.67) | 489.26             |                    |                 |                    | 471.24             |                    |
| L        | 1175.52              | 588.26<br>(588.33) | 579.26             | 1158.49            | 579.75<br>(579.75) | 1077.54            | 539.28<br>(539.25) | 374.23             |                    |                 |                    | 356.22             |                    |
| E        | 1304.56              | 652.79<br>(652.75) | 643.78<br>(643.67) | 1287.54            | 644.27             | 1206.59            | 603.80<br>(603.83) | 261.14             |                    |                 |                    | 243.13<br>(243.17) |                    |
| I        |                      |                    |                    |                    |                    |                    |                    | 132.10             |                    |                 |                    |                    |                    |

|                        |        |
|------------------------|--------|
| [M-H3PO4+2H]2+         | 669.42 |
| [M-H3PO4-H2O+2H]2+     | 660.33 |
| [M-H3PO4-NH3-H2O+2H]2+ | 651.42 |

|                                |                         |
|--------------------------------|-------------------------|
| Yellow:                        | Low&High mass cut off   |
| Red:                           | Relative intensity >0.3 |
| Theoretical m/z (Observed m/z) |                         |

Cx43-35 #3198 @718.33 CID

| S373 CID | b                    | b2+                | [b-H2O]              | [b-H2O]2+          | [b-NH3]              | [b-NH3]2+          | [b-H3PO4]          | [b-H3PO4]2+        | y                    | y2+                  | [y-H3PO4]2+        | [y-NH3]2+          | [y-H2O]            |
|----------|----------------------|--------------------|----------------------|--------------------|----------------------|--------------------|--------------------|--------------------|----------------------|----------------------|--------------------|--------------------|--------------------|
| A        |                      |                    |                      |                    |                      |                    |                    |                    |                      |                      |                    |                    |                    |
| S        | 158.08               |                    |                      |                    |                      |                    |                    |                    | 1364.62              | 682.81<br>(682.92)   | 633.83<br>(633.75) | 674.30             | 1346.61            |
| S        | 326.07               |                    |                      | 308.06             |                      |                    |                    |                    | 228.10               | 1277.59<br>(1277.33) | 639.30<br>(639.42) | 590.31<br>(590.33) | 630.78             |
| R        | 482.18               | 241.59             | 464.17               | 232.59             | 465.15<br>(465.08)   | 233.08             | 384.20<br>(384.33) | 192.60             | 1110.59<br>(1110.58) | 555.80<br>(555.75)   |                    | 547.29<br>(547.08) | 1092.58            |
| P        | 579.23               | 290.12             | 561.22               | 281.11             | 562.20               | 281.60<br>(281.75) | 481.25             | 241.13             | 954.49<br>(954.42)   | 477.75               |                    | 469.23             | 936.48<br>(936.42) |
| R        | 735.33<br>(735.17)   | 368.17             | 717.32               | 359.16             | 718.30               | 359.66             | 637.35<br>(637.50) | 319.18             | 857.44<br>(857.33)   | 429.22               |                    | 420.71             | 839.43             |
| P        | 832.38               | 416.69             | 814.37               | 407.69             | 815.36               | 408.18             | 734.41             | 367.71<br>(367.58) | 701.34<br>(701.42)   |                      |                    |                    | 683.32<br>(683.25) |
| D        | 947.41<br>(947.25)   | 474.21<br>(474.33) | 929.40               | 465.20             | 930.38               | 465.70<br>(465.83) | 849.43<br>(849.33) | 425.22<br>(425.25) | 604.28<br>(604.33)   |                      |                    |                    | 586.27<br>(586.25) |
| D        | 1062.44<br>(1062.42) | 531.72<br>(531.75) | 1044.43<br>(1044.50) | 522.72             | 1045.41<br>(1045.67) | 523.21             | 964.46             | 482.73<br>(482.75) | 489.26               |                      |                    |                    | 471.24             |
| L        | 1175.52<br>(1175.42) | 588.26<br>(588.33) | 1157.51              | 579.26             | 1158.49              | 579.75             | 1077.54            | 539.28<br>(539.33) | 374.23<br>(374.17)   |                      |                    |                    | 356.22             |
| E        | 1304.56              | 652.79<br>(652.83) | 1286.55              | 643.78<br>(643.83) | 1287.54              | 644.27             | 1206.59            | 603.80<br>(603.83) | 261.14               |                      |                    |                    | 243.13<br>(243.25) |
| I        |                      |                    |                      |                    |                      |                    |                    |                    | 132.10               |                      |                    |                    |                    |

|                        |        |
|------------------------|--------|
| [M-H3PO4+2H]2+         | 669.33 |
| [M-H3PO4-H2O+2H]2+     | 660.33 |
| [M-H3PO4-NH3-H2O+2H]2+ | 651.50 |

|                                |                         |
|--------------------------------|-------------------------|
| Yellow:                        | Low&High mass cut off   |
| Red:                           | Relative intensity >0.1 |
| Theoretical m/z (Observed m/z) |                         |

Cx43-37 (11102009) #3921-3965 @612.96 ETD

MASCOT score: 36

| S372 ETD | c                    | c2+                | [c+1]                | [c+1]2+            | z                    | z2+                | [z+1]                | [z+1]2+            |
|----------|----------------------|--------------------|----------------------|--------------------|----------------------|--------------------|----------------------|--------------------|
| A        |                      |                    |                      |                    |                      |                    |                      |                    |
| S        | 176.10               |                    | 177.11               |                    | 1749.80<br>(1749.78) | 875.41<br>(875.13) | 1750.81<br>(1750.72) | 875.91<br>(875.64) |
| S        | 263.14               |                    | 264.14               |                    | 1662.77<br>(1662.39) | 831.89<br>(831.89) | 1663.78<br>(1663.71) | 832.39<br>(832.67) |
| R        | 419.24<br>(419.19)   | 210.12             | 420.24               | 210.62             | 1575.74<br>(1575.89) | 788.37<br>(788.65) | 1576.75<br>(1576.82) | 788.88<br>(789.65) |
| A        | 490.27<br>(490.40)   | 245.64             | 491.28               | 246.14             | 1419.64<br>(1419.45) | 710.32             | 1420.65<br>(1420.55) | 710.83             |
| S        | 657.27<br>(657.32)   | 329.14             | 658.27<br>(658.29)   | 329.64             | 1348.60<br>(1348.29) | 674.80<br>(674.74) | 1349.61<br>(1349.30) | 675.31<br>(675.53) |
| S        | 744.30<br>(744.33)   | 372.66             | 745.31<br>(745.34)   | 373.16             | 1181.60<br>(1181.40) | 591.31             | 1182.61<br>(1182.52) | 591.81             |
| R        |                      |                    |                      |                    | 1094.57<br>(1094.31) | 547.79             | 1095.58<br>(1095.54) | 548.29             |
| P        | 997.46<br>(997.33)   | 499.23<br>(499.24) | 998.46<br>(998.48)   | 499.73             |                      |                    |                      |                    |
| R        |                      |                    |                      |                    | 841.42<br>(841.16)   |                    | 842.43<br>(842.40)   |                    |
| P        | 1250.61<br>(1250.63) | 625.81<br>(625.54) | 1251.61<br>(1251.64) | 626.31<br>(626.24) |                      |                    |                      |                    |
| D        | 1365.64<br>(1365.62) | 683.32<br>(683.10) | 1366.64<br>(1366.64) | 683.82<br>(684.03) |                      |                    |                      |                    |
| D        | 1480.67<br>(1480.63) | 740.84<br>(740.53) | 1481.67<br>(1481.60) | 741.34<br>(741.11) |                      |                    |                      |                    |
| L        | 1593.75<br>(1593.73) | 797.38<br>(797.46) | 1594.75<br>(1594.64) | 797.88<br>(798.17) |                      |                    |                      |                    |
| E        | 1722.79<br>(1722.87) | 861.90             | 1723.80<br>(1723.75) | 862.40             |                      |                    |                      |                    |
| I        |                      |                    |                      |                    |                      |                    |                      |                    |

|          |        |
|----------|--------|
| [M+3H]3+ | 613.22 |
|----------|--------|

|                                |                         |
|--------------------------------|-------------------------|
| Yellow:                        | Low&High mass cut off   |
| Red:                           | Relative intensity >0.1 |
| Theoretical m/z (Observed m/z) |                         |

Cx43-37 (11102009) #4145-4196 @639.61 ETD

MASCOT score: 30

| S369,S373 ETD | c                    | c2+                | [c+1]                | [c+1]2+            | z                    | z2+                | [z+1]                |
|---------------|----------------------|--------------------|----------------------|--------------------|----------------------|--------------------|----------------------|
| A             |                      |                    |                      |                    |                      |                    |                      |
| S             | 176.10               |                    | 177.11               |                    | 1829.77              | 915.39             | 1830.78              |
| S             | 343.10               |                    | 344.10               |                    | 1742.74<br>(1742.79) | 871.87<br>(871.86) | 1743.75<br>(1743.74) |
| R             | 499.20<br>(499.33)   | 250.10             | 500.21<br>(500.35)   | 250.61             | 1575.74              | 788.37             | 1576.75<br>(1576.71) |
| A             | 570.24<br>(570.29)   | 285.62             | 571.24<br>(571.57)   | 286.13             | 1419.64<br>(1419.46) | 710.32             | 1420.65<br>(1420.61) |
| S             | 657.27<br>(657.35)   | 329.14             | 658.27<br>(658.31)   | 329.64             | 1348.60              | 674.80             | 1349.61<br>(1349.45) |
| S             | 824.27<br>(824.29)   | 412.64             | 825.27<br>(825.29)   | 413.14             | 1261.57              | 631.29             | 1262.58<br>(1262.49) |
| R             |                      |                    |                      |                    | 1094.57<br>(1094.42) | 547.79             | 1095.58<br>(1095.49) |
| P             | 1077.42<br>(1077.42) | 539.22             | 1078.43<br>(1078.45) | 539.72             |                      |                    |                      |
| R             |                      |                    |                      |                    | 841.42<br>(841.34)   |                    | 842.43<br>(842.45)   |
| P             | 1330.58<br>(1330.52) | 665.79<br>(665.57) | 1331.58<br>(1331.52) | 666.29<br>(666.40) |                      |                    |                      |
| D             | 1445.60<br>(1445.59) | 723.31<br>(723.10) | 1446.61<br>(1446.72) | 723.81<br>(723.87) |                      |                    |                      |
| D             | 1560.63<br>(1560.52) | 780.82<br>(780.67) | 1561.63<br>(1561.63) | 781.32<br>(781.39) |                      |                    |                      |
| L             | 1673.72<br>(1673.77) | 837.36<br>(837.52) | 1674.72<br>(1674.82) | 837.86             |                      |                    |                      |
| E             | 1802.76<br>(1802.95) | 901.88             | 1803.76<br>(1803.78) | 902.38             |                      |                    |                      |
| I             |                      |                    |                      |                    |                      |                    |                      |

|          |        |
|----------|--------|
| [M+3H]3+ | 639.91 |
|----------|--------|

|                                |                         |
|--------------------------------|-------------------------|
| Yellow:                        | Low&High mass cut off   |
| Red:                           | Relative intensity >0.2 |
| Theoretical m/z (Observed m/z) |                         |

Supplemental Table S9. Fragmentation ions for native Cx43 peptide containing S306.

Cx43-IP #3093 @988.39 CID

| <b>S306 CID</b> | b                    | [b-H2O]              | [b-NH3]              | [b-H3PO4]            | y                    | y 2+               | [y-H3PO4]2+        | [y-H2O]            |
|-----------------|----------------------|----------------------|----------------------|----------------------|----------------------|--------------------|--------------------|--------------------|
| Q               |                      |                      |                      |                      |                      |                    |                    |                    |
| A               | 200.10               |                      | 183.08               |                      | 1847.73              | 924.37             | 875.38             | 1829.72            |
| S               | 367.10               |                      | 350.07               | 269.12               | 1776.70<br>(1776.46) | 888.85<br>(888.50) | 839.86<br>(839.81) | 1758.69            |
| E               | 496.14               | 478.13               | 479.12               | 398.17               | 1609.70<br>(1609.69) | 805.35<br>(804.95) |                    | 1591.69            |
| Q               | 624.20               | 606.19<br>(606.08)   | 607.18               | 526.23<br>(526.16)   | 1480.66<br>(1480.45) | 740.83             |                    | 1462.65            |
| N               | 738.24               | 720.23               | 721.27<br>(720.99)   | 640.27<br>(640.22)   | 1352.60<br>(1352.46) | 676.80             |                    | 1334.59            |
| W               | 924.32               | 906.31               | 907.30<br>(907.20)   | 826.35<br>(826.40)   | 1238.55<br>(1238.51) | 619.78             |                    | 1220.54            |
| A               | 995.36               | 977.35               | 978.34               | 897.39<br>(897.42)   | 1052.48<br>(1052.42) | 526.74             |                    | 1034.46            |
| N               | 1109.40<br>(1108.81) | 1091.39<br>(1091.28) | 1092.38<br>(1092.20) | 1011.43              | 981.44               | 491.22<br>(491.11) |                    | 963.43             |
| Y               | 1272.47<br>(1272.33) | 1254.46              | 1255.44<br>(1255.29) | 1174.49<br>(1174.32) | 867.40 (867.42)      | 434.20             |                    | 849.39<br>(849.49) |
| S               | 1359.50              | 1341.49<br>(1341.32) | 1342.47<br>(1342.08) | 1261.52<br>(1261.46) | 704.33 (704.26)      | 352.67             |                    | 686.32<br>(686.36) |
| A               | 1430.54              | 1412.53              | 1413.51              | 1332.56              | 617.30 (617.32)      | 309.15             |                    | 599.29             |
| E               | 1559.58              | 1541.57<br>(1541.45) | 1542.55              | 1461.60<br>(1461.47) | 546.26 (546.21)      | 273.64             |                    | 528.25<br>(528.41) |
| Q               | 1687.64              | 1669.63              | 1670.61<br>(1670.13) | 1589.66<br>(1589.23) | 417.22 (417.17)      | 209.11             |                    |                    |
| N               | 1801.68              | 1783.67              | 1784.65<br>(1784.51) | 1703.70              | 289.16               | 145.08             |                    |                    |
| R               |                      |                      |                      |                      | 175.12               | 88.06              |                    |                    |

|                        |        |
|------------------------|--------|
| [M-H3PO4+2H]2+         | 939.25 |
| [M-H3PO4-H2O+2H]2+     | 930.53 |
| [M-H3PO4-NH3-H2O+2H]2+ | 922.16 |

|                                |                       |
|--------------------------------|-----------------------|
| Yellow:                        | Low&High mass cut off |
| Red:                           | Relative intensity >2 |
| Theoretical m/z (Observed m/z) |                       |

Supplemental Table S10. Fragmentation ions for native Cx43 peptide containing S372 and S373.

Cx43-IP #3307-3419 @639.61 ETD

MASCOT score: 14

S372,S373 ETD

|   | c                    | c 2+               | [c+1]                | [c+1]2+            | z                    | z 2+               | [z+1]                |
|---|----------------------|--------------------|----------------------|--------------------|----------------------|--------------------|----------------------|
| A |                      |                    |                      |                    |                      |                    |                      |
| S | 176.10               |                    | 177.11               |                    | 1829.77              | 915.39<br>(915.20) | 1830.78<br>(1830.56) |
| S | 263.14               |                    | 264.14               |                    | 1742.74<br>(1742.64) | 871.87<br>(871.61) | 1743.75<br>(1743.74) |
| R | 419.24               | 210.12             | 420.24               | 210.62             | 1655.71              | 828.36<br>(828.04) | 1656.71              |
| A | 490.27               | 245.64             | 491.28               | 246.14             | 1499.61              | 750.31             | 1500.61              |
| S | 657.27<br>(657.41)   | 329.14             | 658.27<br>(658.31)   | 329.64             | 1428.57<br>(1428.28) | 714.79<br>(714.66) | 1429.58              |
| S | 824.27<br>(824.26)   | 412.64             | 825.27<br>(825.31)   | 413.14             | 1261.57<br>(1261.26) | 631.29             | 1262.58<br>(1262.58) |
| R |                      |                    |                      |                    | 1094.57<br>(1094.29) | 547.79             | 1095.58<br>(1095.32) |
| P | 1077.42<br>(1077.34) | 539.22             | 1078.43<br>(107837)  | 539.72             |                      |                    |                      |
| R |                      |                    |                      |                    | 841.42<br>(841.29)   | 421.21             | 842.43<br>(842.45)   |
| P | 1330.58<br>(1330.35) | 665.79<br>(665.45) | 1331.58<br>(1331.15) | 666.29<br>(666.07) |                      |                    |                      |
| D | 1445.60<br>(1445.55) | 723.31<br>(723.09) | 1446.61<br>(1446.75) | 723.81<br>(723.88) | 588.26               |                    | 589.27               |
| D | 1560.63<br>(1560.66) | 780.82<br>(780.56) | 1561.63<br>(1561.73) | 781.32<br>(781.41) | 473.24               |                    | 474.24               |
| L | 1673.72              | 837.36<br>(837.36) | 1674.72              | 837.86             | 358.21               |                    | 359.22               |
| E | 1802.76              | 901.88<br>(901.89) | 1803.76              | 902.38<br>(902.63) | 245.13               |                    | 246.13               |
| I |                      |                    |                      |                    | 116.08               |                    | 117.09               |

|          |        |
|----------|--------|
| [M+3H]3+ | 639.89 |
|----------|--------|

|                                |                         |
|--------------------------------|-------------------------|
| Yellow:                        | Low&High mass cut off   |
| Red:                           | Relative intensity >0.1 |
| Theoretical m/z (Observed m/z) |                         |



**Supplemental Table S11. Phosphoserine-containing peptides from native (in vivo) Cx43.**

| Sequence         | Start-end | Charge | Theoretical mass | Observed mass | Phosphorylation site localized | MASCOT score (CID) | MASCOT score (ETD) | Diagnostic ions (CID)             | Diagnostic ions (ETD)                              |
|------------------|-----------|--------|------------------|---------------|--------------------------------|--------------------|--------------------|-----------------------------------|----------------------------------------------------|
| QASEQNWANYSAEQNR | 304-319   | 2      | 1974.786         | 1974.787      | S306                           | 52                 | N/A                | y <sub>13</sub> , y <sub>14</sub> | N/A                                                |
| ASSRASSRPRPDDLEI | 367-382   | 3      | 1915.819         | 1915.809      | S372, S373                     | N/A                | 14                 | N/A                               | z <sub>9</sub> , z <sub>10</sub> , z <sub>11</sub> |
